# Supplementary material for: Quantifying Food Loss and Waste in Saudi Arabia
Source: MDPI journal article supplement (doi:10.3390/su13169444), 2021-08-23
Supplement: s1 [file s1]

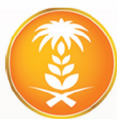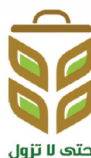

# Saudi FLW Baseline

## Food Loss & Waste index In Kingdom of Saudi Arabia

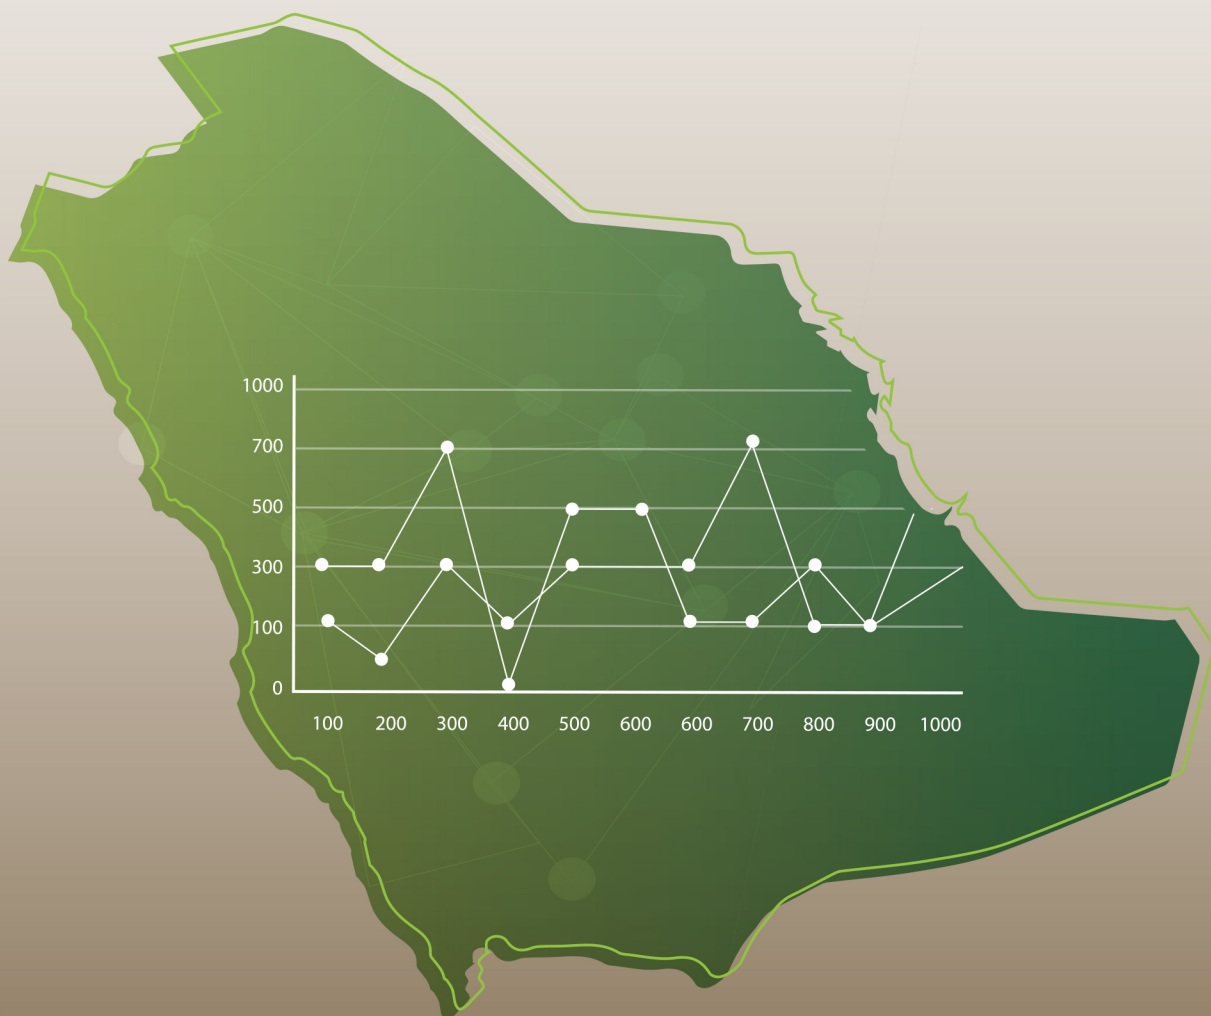

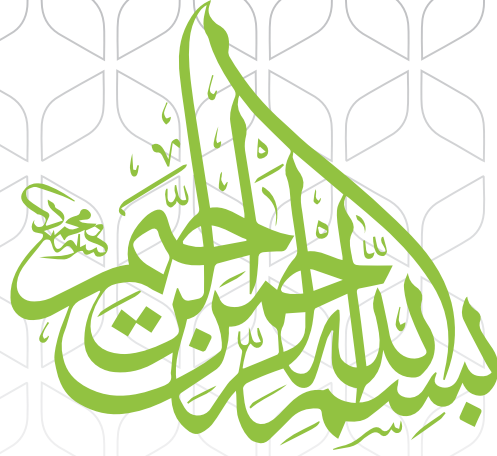

# **Saudi FLW Baseline**

## **Food Loss & Waste index**

### **In Kingdom of Saudi Arabia**

**National Program for  
Reducing FLW in KSA**

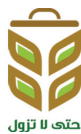

**المؤسسة العامة للحبوب**  
Saudi Grains Organization (SAGO)  
المملكة العربية السعودية

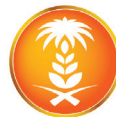

ح) المؤسسة العامة للحبوب ، ١٤٤٠هـ

فهرسة مكتبة الملك فهد الوطنية أثناء النشر

المؤسسة العامة للحبوب  
خط الأساس : مؤشر الفقد والهدر في الغذاء بالمملكة العربية  
السعودية. / المؤسسة العامة للحبوب -. الرياض ، ١٤٤٠هـ  
١٠٨ ص ؛ ..سم

ردمك: ٩٧٨-٦٠٣-٠٢-٩٥٢٠-٣  
١- الاغذية - استهلاك - السعودية ٢- ترشيد الاستهلاك -  
السعودية أ.العنوان  
ديوي ٦٥٨,٨٣٤ ١٤٤٠/٥٢٧٤

رقم الإيداع: ١٤٤٠/٥٢٧٤  
ردمك: ٩٧٨-٦٠٣-٠٢-٩٥٢٠-٣

## Foreword by The Governor of Saudi Grains Organization (SAGO)

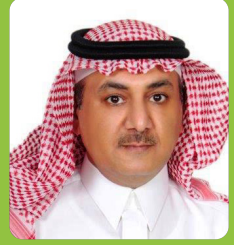

The National Program for Reducing Food Loss & Waste is a cornerstone of the Food Security Strategy, overseen by Saudi Grains Organization (SAGO).

The organization succeeded in determining the baseline for the size of Food Loss and Waste (FLW), through applying universally recognized scientific methods and conducting a field survey, covering all regions of the Kingdom of Saudi Arabia.

One of the main objectives of the National Transformation Program 2020 (NTP2020) is to reduce FLW, and it is an integral part of the Kingdom's Food Security Strategy.

The baseline sets the foundation of a deliberate plan, focused initially on spreading awareness throughout the food supply chain to recognize and reduce FLW, this plan follows our Islamic values, which clearly call for minimizing FLW and preserving the grace of food.

The initiative also lies within the 2030 Vision of the Kingdom, which aims to maximise all economic and social resources.

Allah has blessed this country, with blessings of diversity and availability of food ,this necessitates an awareness of any overspending behaviors, and a call for everyone to reduce this.

**Eng. Ahmed Bin Abdul-Aziz Alfares**  
Governor of Saudi Grain Organization (SAGO)



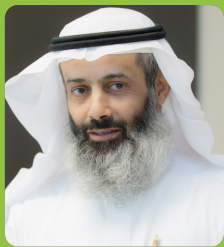

## **Preface by Director of the National Program for Reducing FLW**

**Thanks to Allah, this FLW baseline research is completed, and we can put before you the results for local and global review. This research will form a reliable cornerstone for research, awareness campaigns, for measuring the level of change in consumer awareness and behavior. It will allow measuring the effects of that change in the coming years.**

**The basis of making any plan for detailed studies should be provision of credible and clear data. Calculations of FLW from the baseline will be credible and clear because of this research and resulting data. This clarity is more critical in countries who lack resources, or who have higher rates of FLW.**

**Saudi Grains Organaization (SAGO) is entrusted with the implementation of the National Program to reduce FLW. We took into consideration the need for data based on reality, away from the influence or bais of the media's reports regardless of their source.**

**We relied on scientific criteria in the study to achieve international standars for a baseline, following the measurement and estimates of the size of both Loss and Waste of food. We analyzed both economic and social causes for the behavior to ensure that we can increase consumer awareness around FLW.**

**One of our Islamic values is to warn against extravagance and wasteful behavior.**

**Finally, we ask Allah to benefit the kingdom from this study, which represents a religious and patriotic obligation for the good of the Kingdom of Saudi Arabia and its inhabitants.**

**Mr. Zaid bin Abdullah Alshbanat**  
**General Director of Prices at (SAGO) & Director**  
**of the National Program for Reducing FLW**  
**7 Jumada I 1440 AH**

## Introduction by General Supervisor & Head of Scientific Study Group

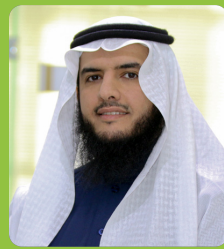

Attempts have been made to quantify global food waste over several decades, motivated partly by the need to highlight the scale of 'waste' in relation to global malnutrition. Such assessments are reliant on limited datasets collected across the food supply chain (FSC) at different times and extrapolated to the larger picture.

In the Kingdom of Saudi Arabia, ensuring food security remains a major challenge. This is true, especially against the background of scarcity of resources. Our main challenge during the coming decades is not to use more investment and greater physical inputs in order to increase food production but rather to pick up a great deal of slack that exists throughout our food system.

Issuing this baseline aims mainly to quantify Food Loss and Waste (FLW) in Saudi Arabia according to the international standard of (FLW). This field survey is the first of its kind, nationally and internationally, in terms of the number of food products surveyed, geographical scope, sample size, as well as the qualitative distribution of (FSC) sites. It was launched by the Saudi Grains Organization (SAGO) "Ministry of Environment, Water and Agriculture" in cooperation with AL-Imam Muhammad Bin Saud Islamic University. FAO's (CFW) expert, Dr. Claudia Giordano, did not hide her delight at the existence of such an important, large and detailed study, which is not available in many international studies in this field.

The team was keen to check the results of the field survey by carrying out a pilot study covering 35 cities in all regions of the kingdom, accompanied by a behavioral insights study, involving 20 associations of preservation of grace.

**Dr. Abdulrahman Nasser Al-Khorayef**  
General Supervisor and  
Head of Scientific Study Team

## Table of Contents

|          | Subject                                                                                         | Page           |
|----------|-------------------------------------------------------------------------------------------------|----------------|
|          | <b>Foreword: Governor of Saudi Grains Organization (SAGO)</b>                                   | <b>3</b>       |
|          | <b>Preface: Director of the National Program for Reducing FLW</b>                               | <b>4</b>       |
|          | <b>Introduction: General Supervisor &amp; Head of Scientific Study Team</b>                     | <b>5</b>       |
| <b>1</b> | <b>1<sup>st</sup> Chapter : Methodology &amp; Terminologies</b>                                 | <b>8 - 19</b>  |
|          | Field survey objectives                                                                         | 10             |
|          | Concepts and terminology                                                                        | 11             |
|          | Main features of the field survey                                                               | 13             |
|          | Calculation of Food Loss & Waste                                                                | 16             |
| <b>2</b> | <b>2<sup>nd</sup> Chapter : Data collection (Statistics)</b>                                    | <b>20 - 37</b> |
|          | Total of loss & waste samples                                                                   | 22             |
|          | Distribution of Loss - Waste samples by the supply chain                                        | 23             |
|          | Distribution of samples by Region & Cities                                                      | 25             |
|          | Distribution of samples by Region for each Products                                             | 29             |
| <b>3</b> | <b>3<sup>rd</sup> Chapter : Results of Food Loss &amp; waste index<br/>"Saudi FLW-Baseline"</b> | <b>38 - 65</b> |
|          | Total FLW ratios for Study Products                                                             | 40             |
|          | FLW Ratio for each product                                                                      | 42             |
|          | Distribution of FLW Ratio by the supply chain for each product                                  | 45             |
|          | Data & information sources                                                                      | 64             |
|          | Exports & Imports of Food Products - General Authority for Statistics                           | 65             |
|          | Scientific & administrative Study Team                                                          | 66             |

البرنامج الوطني للحد من  
الفقد والهدر في الغذاء  
بالمملكة العربية السعودية

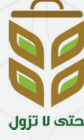

المؤسسة العامة للحبوب  
Saudi Grains Organization (SAGO)  
المملكة العربية السعودية

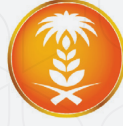

لَا إِلَهَ إِلَّا اللَّهُ مُحَمَّدٌ رَسُولُ اللَّهِ

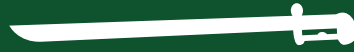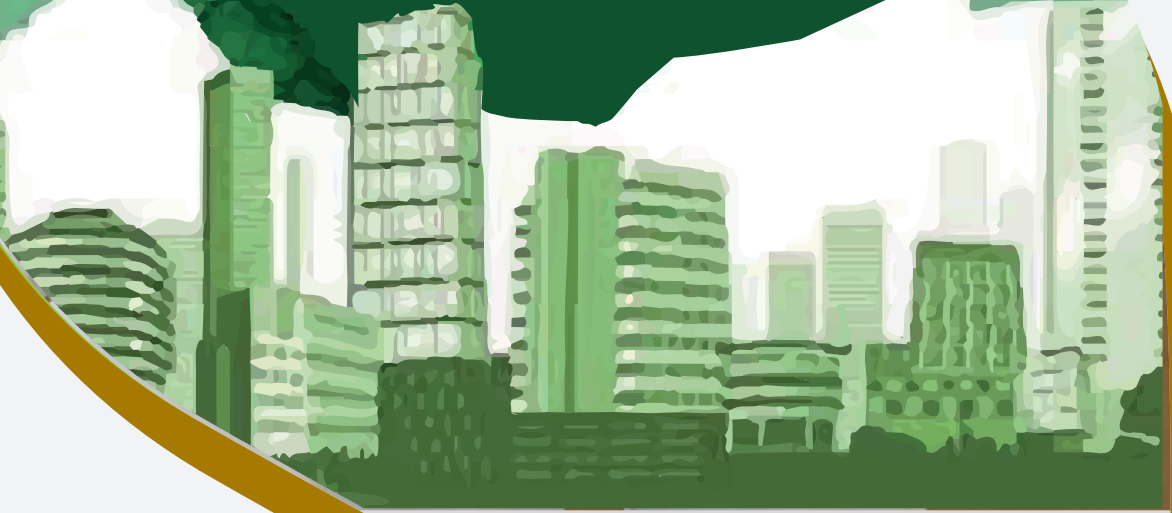

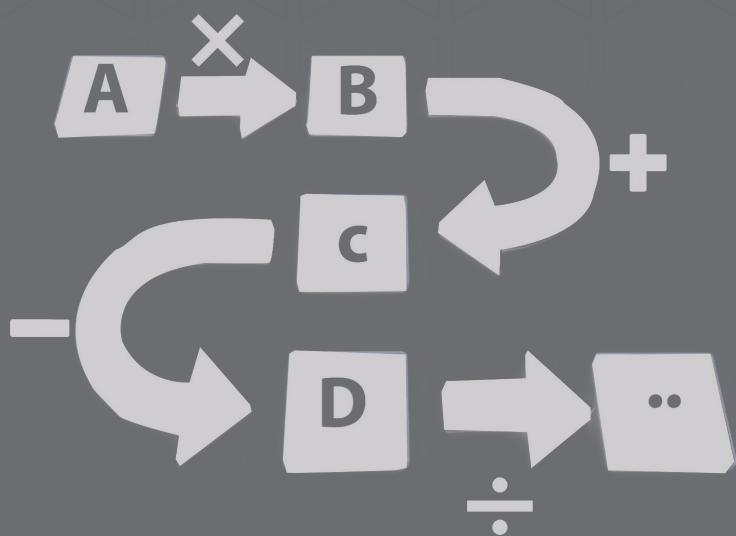

**National Program for  
Reducing FLW in KSA**

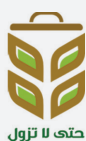

**المؤسسة العامة للحبوب**  
Saudi Grains Organization (SAGO)  
المملكة العربية السعودية

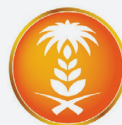



# 1<sup>st</sup>

Chapter

Methodology & Terminologies

**Saudi FLW Baseline**

**Food Loss & Waste index  
In Kingdom of Saudi Arabia**

## Field Survey Objectives

- 1 To estimate the amount of food loss and waste in Saudi Arabia in a scientific way according to international standards.
- 2 To measure the economic losses resulting from food loss and waste in Saudi Arabia.
- 3 To analyze the economic, social and cultural causes of FLW in Saudi Arabia.
- 4 To compare the amount of FLW in Saudi Arabia with some other countries.
- 5 To propose policies and plans to reduce food loss and waste FLW in Saudi Arabia.
- 6 To provide the Saudi Grains Organization (SAGO) with a performance index for FLW until the year 2020 in the national transformation program.

## Concepts and Terminology

### Food Loss

This means the quantities of food lost along the food supply chain (on farms, factories, transportation, etc.) that do not reach end consumer.

### Food Waste

This explains what is wasted from food prepared for consumption after the stages of production and distribution in restaurants, hotels, houses .. and

### Study Products

This study sought to determine the amount of loss and waste of 19 food products grouped into eight groups:

1. Wheat "Flour - Bread"
2. Rice
3. Dates
4. Vegetables "Eggplant – Cucumber – Tomato – Onion – Potato – Carrots"
5. Fruits "Orange – Melon – Mango"
6. Red meat "Camels – Lamb"
7. Poultry
8. Fish

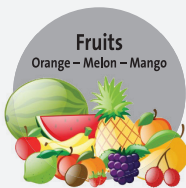

Fruits  
Orange – Melon – Mango

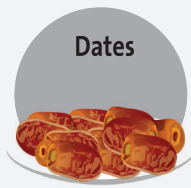

Dates

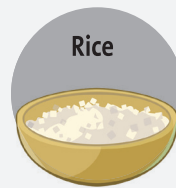

Rice

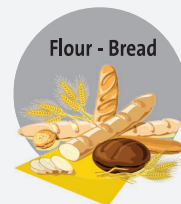

Flour - Bread

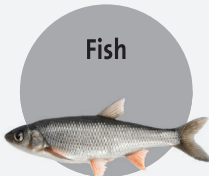

Fish

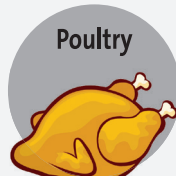

Poultry

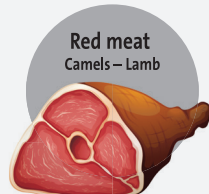

Red meat  
Camels – Lamb

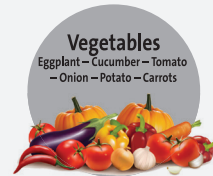

Vegetables  
Eggplant – Cucumber – Tomato  
– Onion – Potato – Carrots



## Sites of the Food Supply Chain

The following diagram shows the main 33 sites of the food supply chain that were covered by this study (Pilot and Main Study).

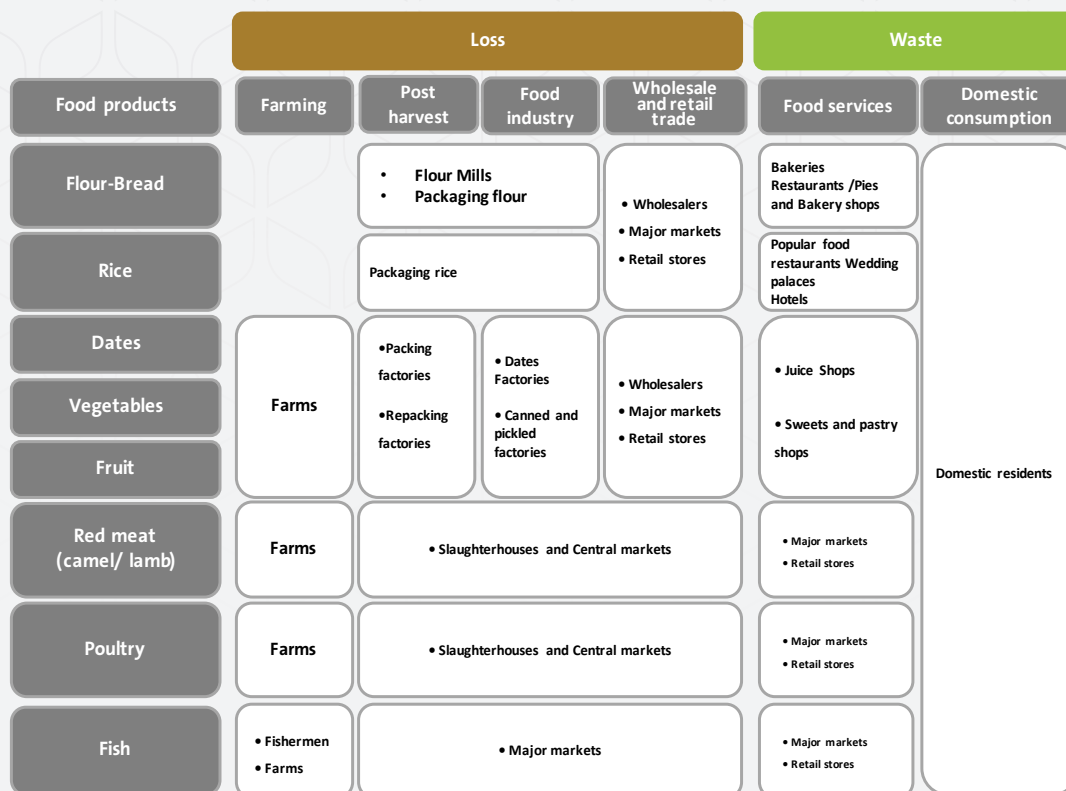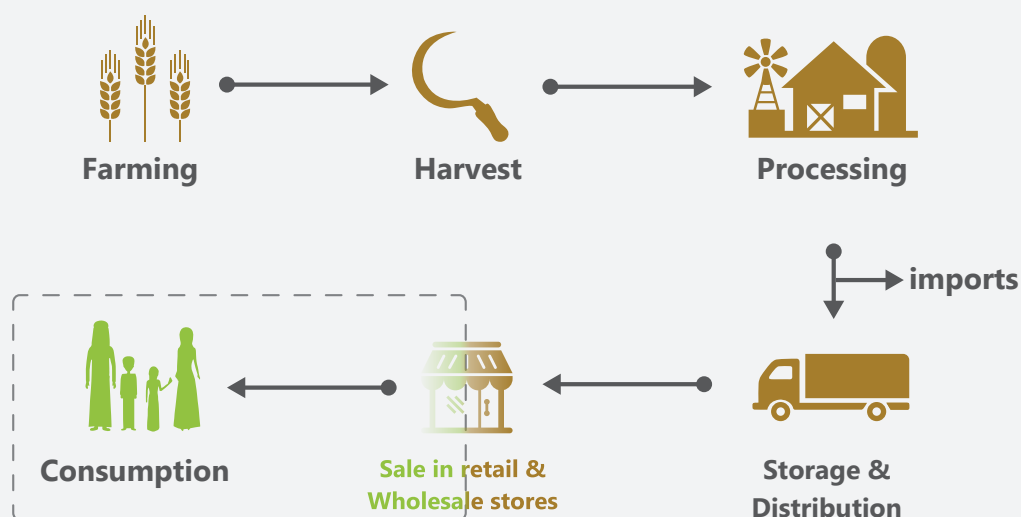

## Main Features of the Field Survey

### Study Products

حجم وتوزيع العينة

The field survey of the study sample includes the following:

1. The pilot study consists of 7210 Samples distributed among 13 administrative regions of the Kingdom [one city / province in each region].
2. Main study: consists of 41790 samples distributed over 35 cities of the Kingdom.
3. Behavioral qualitative study: composed of 1000 samples distributed in 27 cities of the Kingdom.
4. Quality assurance study: composed of 500 samples distributed across the Kingdom of Saudi Arabia.

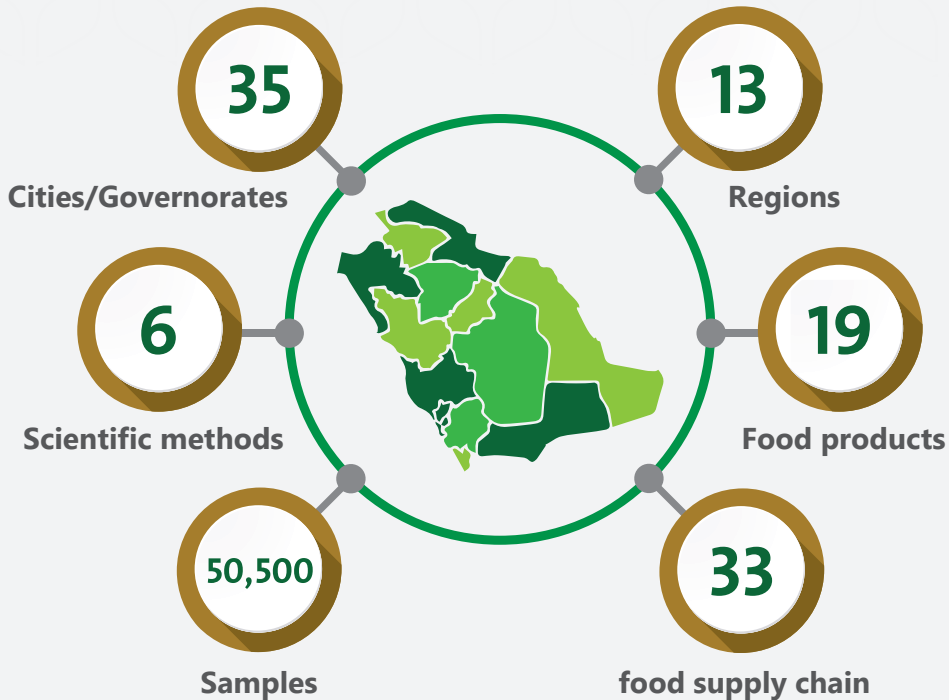

## Distribution of the Pilot Study Sample

| Food products          | Loss       |              |               |                          | Waste         |                      |
|------------------------|------------|--------------|---------------|--------------------------|---------------|----------------------|
|                        | Farming    | Post harvest | Food Industry | Wholesale & retail trade | Food services | Domestic consumption |
| Flour-Bread            |            | 70           |               | 420                      | 700           | 1,400                |
| Rice                   |            | 70           |               |                          | 700           |                      |
| Dates                  |            |              |               |                          |               |                      |
| Vegetables             | 70         | 70           | 70            | 420                      | 700           |                      |
| Fruit                  |            |              |               |                          |               |                      |
| Red meat (camel/ lamb) | 70         | 70           |               |                          | 700           |                      |
| Poultry                | 70         | 70           |               |                          | 700           |                      |
| Fish                   | 70         | 70           |               |                          | 700           |                      |
| <b>Total= 7210</b>     | <b>280</b> | <b>1,330</b> |               |                          | <b>4,200</b>  | <b>1,400</b>         |

## Distribution of the Main Study Sample

| Food products          | Loss         |              |               |                          | Waste         |                      |
|------------------------|--------------|--------------|---------------|--------------------------|---------------|----------------------|
|                        | Farming      | Post harvest | Food Industry | Wholesale & retail trade | Food services | Domestic consumption |
| Flour-Bread            |              | 700          |               | 700                      | 2,100         | 20,090               |
| Rice                   |              | 700          |               |                          | 2,100         |                      |
| Dates                  |              |              |               |                          |               |                      |
| Vegetables             | 700          | 700          | 700           | 700                      | 2,100         |                      |
| Fruit                  |              |              |               |                          |               |                      |
| Red meat (camel/ lamb) | 700          | 700          |               |                          | 2,100         |                      |
| Poultry                | 700          | 700          |               |                          | 2,100         |                      |
| Fish                   | 700          | 700          |               |                          | 2,100         |                      |
| <b>Total= 41,790</b>   | <b>2,800</b> | <b>6,300</b> |               |                          | <b>12,600</b> | <b>20,090</b>        |

## Distribution of Behavioral Qualitative Study Sample

| Sector      | Preparation of questionnaires |
|-------------|-------------------------------|
| Families    | ( 617 ) questionnaires        |
| Restaurants | ( 383 ) questionnaires        |
| Total       | ( 1000 ) questionnaires       |

## Distribution of Quality Assurance Study Sample

| Food products          | Loss    |              |               |                          | Waste         |                      |
|------------------------|---------|--------------|---------------|--------------------------|---------------|----------------------|
|                        | Farming | Post harvest | Food Industry | Wholesale & retail trade | Food services | Domestic consumption |
| Flour-Bread            |         | 12           |               | 12                       | 12            | 152                  |
| Rice                   |         | 12           |               |                          | 12            |                      |
| Dates                  |         |              |               |                          |               |                      |
| Vegetables             | 36      | 36           | 36            | 36                       | 36            |                      |
| Fruit                  |         |              |               |                          |               |                      |
| Red meat (camel/ lamb) | 12      | 12           |               |                          | 12            |                      |
| Poultry                | 12      | 12           |               |                          | 12            |                      |
| Fish                   | 12      | 12           |               |                          | 12            |                      |
| Total= 500             | 72      | 180          |               |                          | 96            | 152                  |

## Calculation of Food Loss & Waste

Based on FAO study "Global Food Losses and Food Waste: Extent, causes and prevention, 2011."

The methodology calculates food loss and waste quantities for each stage of the five stages of food supply chain (FSC):

- (1) Production
- (2) post-harvest handling and storage
- (3) Processing and packaging
- (4) distribution (fresh and processed)
- (5) Consumption (fresh and processed).

Domestic supply quantity ( E ) :

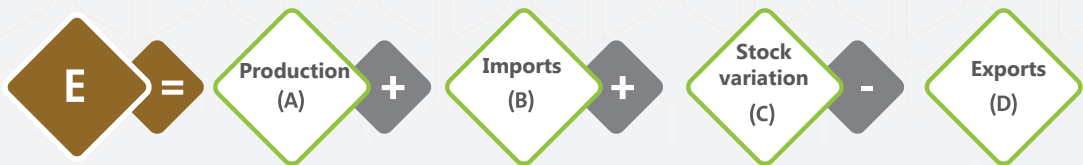

Available food ( J ) :

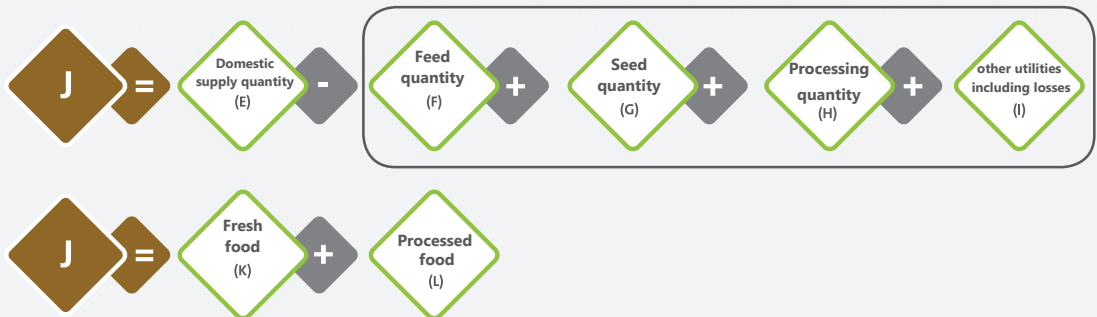

## Definitions

1. Loss rate for production stage = LRP
2. Loss rate for post-harvest handling and storage stage = LRPH
3. Loss rate for processing and packaging stage = LRPK
4. Loss rate for distribution stage (fresh) = LRDF
5. Loss rate for distribution stage (Processed) = LRDP
6. Loss rate for consumption stage (fresh) = LRCF
7. Loss rate for consumption stage (Processed) = LRCP
8. Conversion factors:
  - Peeling by hand = X
  - Industrial peeling = Y
  - Mean = Z

## Calculation of the Initial Equivalent of Loss & Waste at the Stages of the Food Supply Chain

### 1- Losses in the production stage:

$$L_p = A * LR_p / (1 - LR_p)$$

### 2- Losses in the post-harvest handling and storage stage:

$$L_{PH} = A * LR_{PH}$$

### 3- Losses in the processing and packaging stage:

$$L_{PK} = (H+L) * LR_{PK}$$

### 4- Losses in the distribution stage:

$$L_D = L_{DF} + L_{DP}$$

Diagram showing the calculation of distribution losses ( $L_D$ ) as the sum of losses in fresh distribution ( $L_{DF}$ ) and losses in processed distribution ( $L_{DP}$ ).

#### A- Losses in fresh

$$L_{DF} = K * LR_{DF}$$

#### B- Losses in processed

$$L_{PF} = (H+L * L_{PK}) * LR_{DP}$$

### 5- Waste in the consumption stage:

$$W = W_{CF} + W_{CP}$$

Diagram showing the calculation of total waste ( $W$ ) as the sum of fresh consumption waste ( $W_{CF}$ ) and processed consumption waste ( $W_{CP}$ ).

#### A- Fresh consumption

$$W_{CF} = (K - L_{DF}) * LR_{CF}$$

#### B- Processed consumption

$$W_{CP} = (L + H - L_{PK} - L_{DP}) * LR_{CP}$$

## Loss & Waste at Every Stage of The Food Supply Chain

### 1- Losses in the production stage:

$$FL_p = L_p * Z$$

### 2- Losses in the post-harvest handling and storage stage:

$$FL_{PH} = L_{PH} * Z$$

### 3- Losses in the processing and packaging stage:

$$FL_{PK} = L_{PK} * Y$$

### 4- Losses in the distribution stage:

$$FL_D = \text{fresh distribution losses (FL}_{DF}) + \text{processed distribution losses (FL}_{DP})$$

#### A-Fresh distribution losses:

$$FL_{DF} = L_{DF} * X$$

#### B- Processed distribution

$$FL_{DP} = L_{DP} * X$$

### 5-Waste in the consumption stage:

$$FW = \text{fresh consumption waste (FW}_{CF}) + \text{processed consumption waste (FW}_{CP})$$

#### A- Fresh consumption

$$FW_{CF} = W_{CF} * X$$

#### B- Processed consumption

$$FW_{CP} = W_{CP} * Y$$

## Total Calculations of Loss & Waste

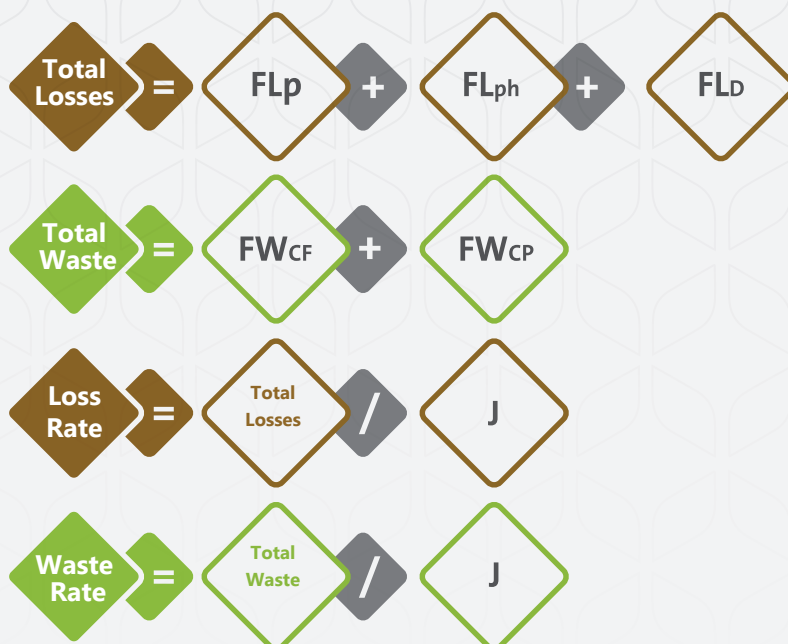

## Calculation of the value of loss & loss in Saudi Riyals

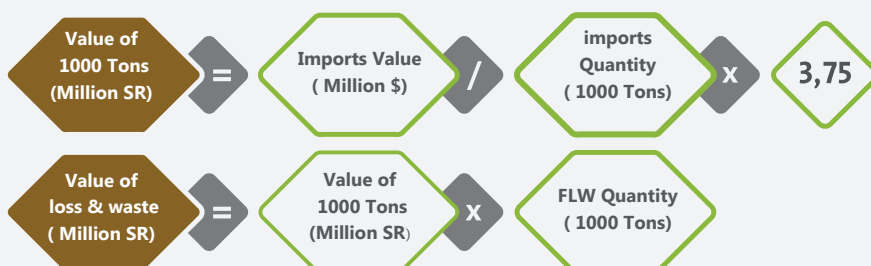

## Per capita food loss & waste account

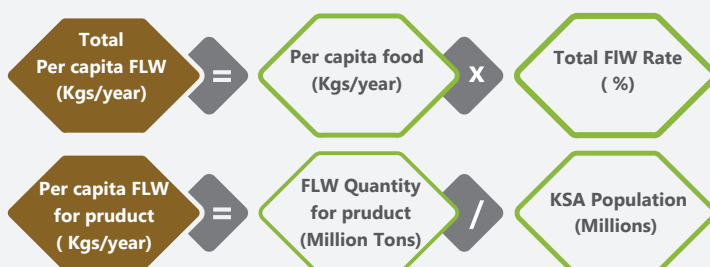

Per capita food according to the data of General Authority for Statistics ,2016, is ( 555 kg / year )



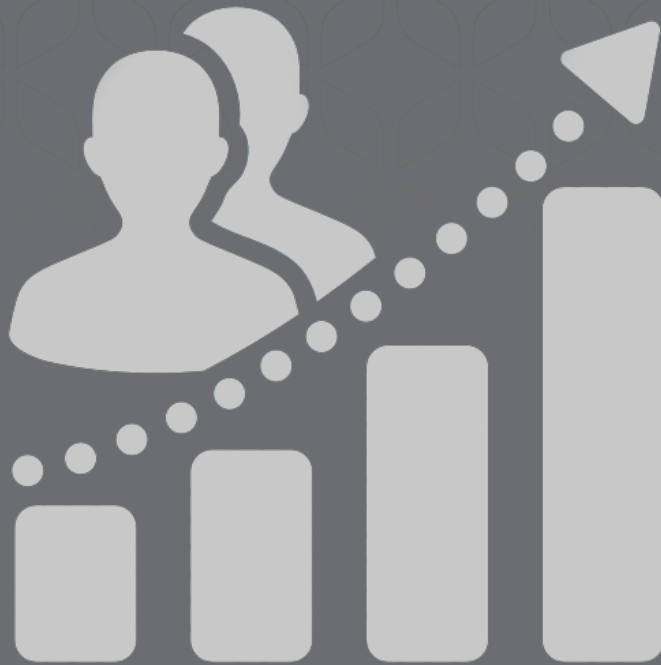

**National Program for  
Reducing FLW in KSA**

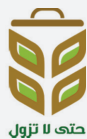

**المؤسسة العامة للحبوب**  
Saudi Grains Organization (SAGO)  
المملكة العربية السعودية

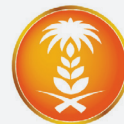

# 2<sup>nd</sup>

## Chapter

### Data collection ( statistics )

#### **Saudi FLW Baseline**

**Food Loss & Waste index  
In Kingdom of Saudi Arabia**

## Total of Loss & Waste Samples

Loss sample

6,162

Waste sample

24,727

30,889\*  
Total Samples

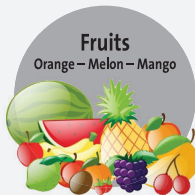

**Fruits**  
Orange – Melon – Mango

1.883

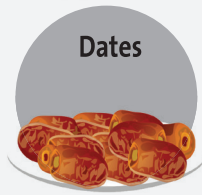

**Dates**

954

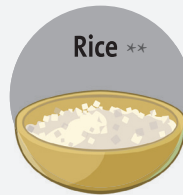

**Rice \*\***

12.933

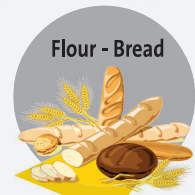

**Flour - Bread**

5.437

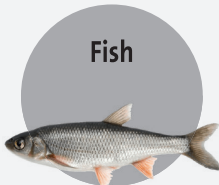

**Fish**

1.255

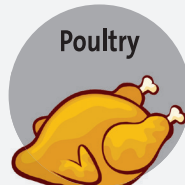

**Poultry**

3.698

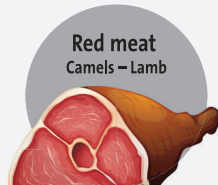

**Red meat**  
Camels – Lamb

1.514

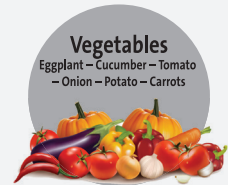

**Vegetables**  
Eggplant – Cucumber – Tomato  
– Onion – Potato – Carrots

3.215

\* Total samples is (52,720) , The incomplete and incorrect samples were excluded.

\*\* The increase in rice samples because it's the main meal in most supply chain sites (houses, restaurants ,....).

## Distribution of Loss - Waste Samples by the Supply Chain

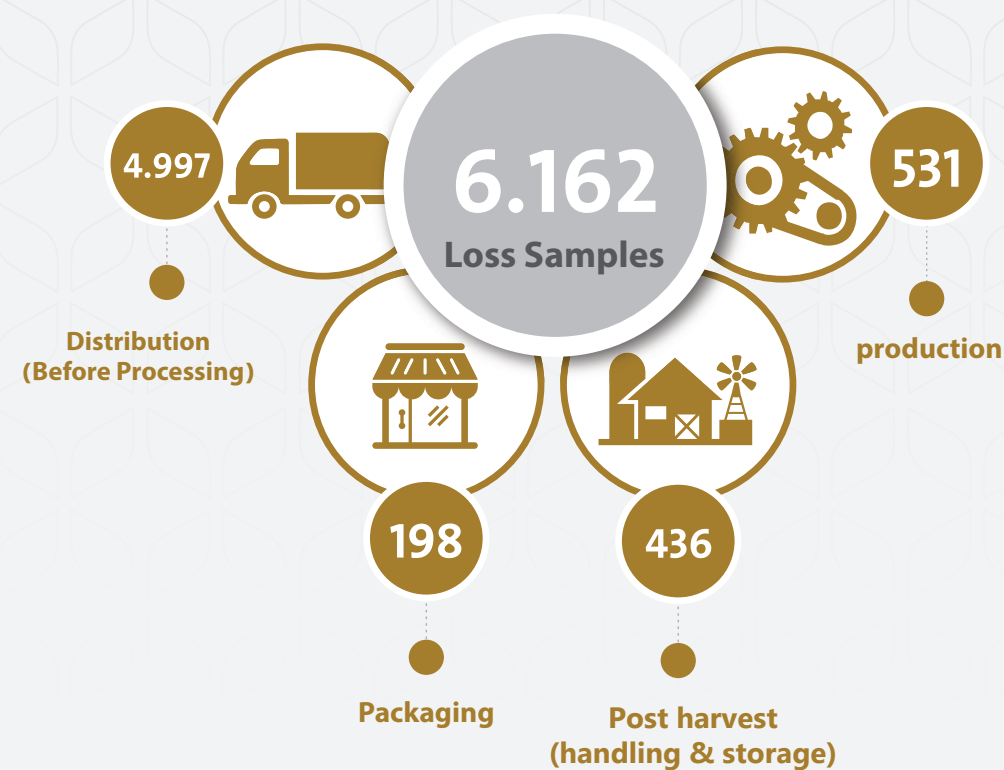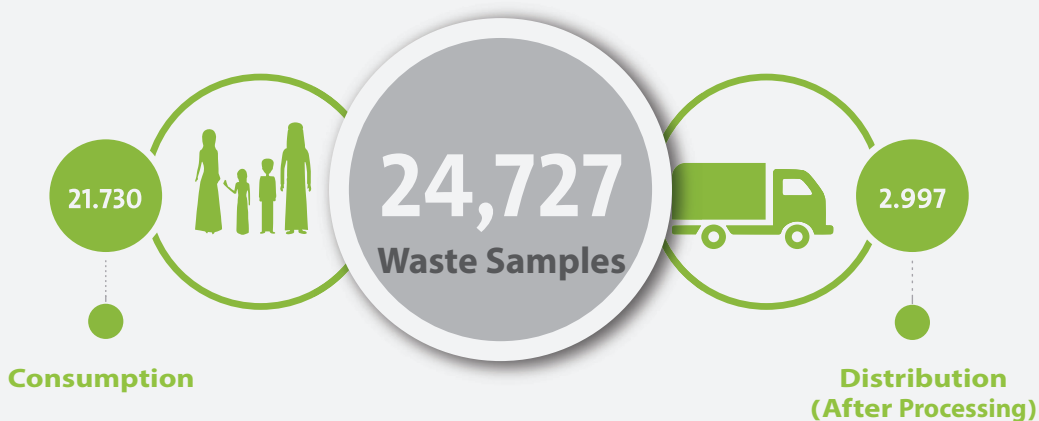

## Distribution of Loss - Waste Samples by Products

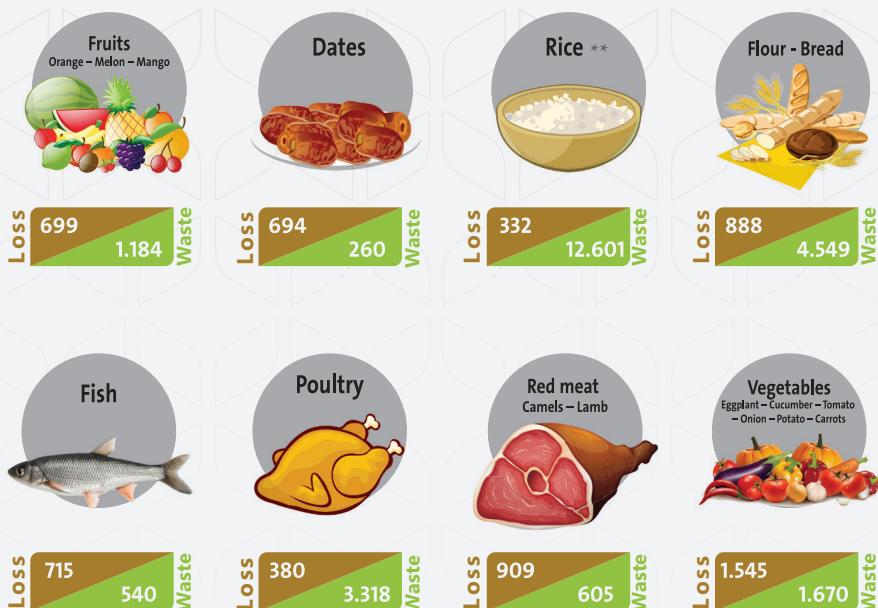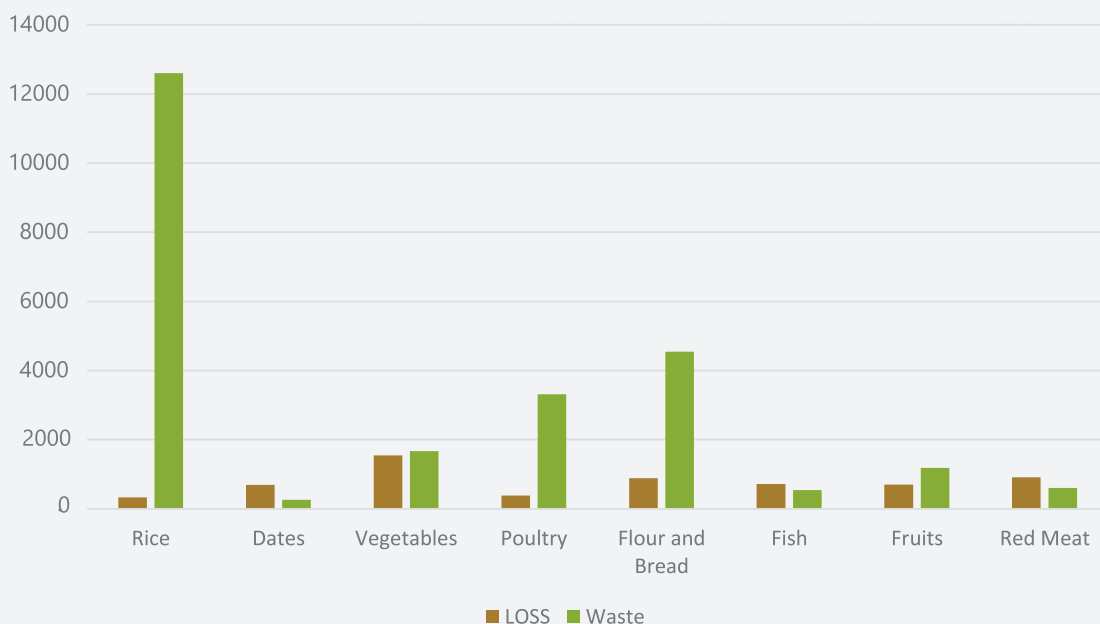

\* The increase in rice samples because it's the main meal in most supply chain sites (houses, restaurants ,....).

## Distribution of Samples by Region

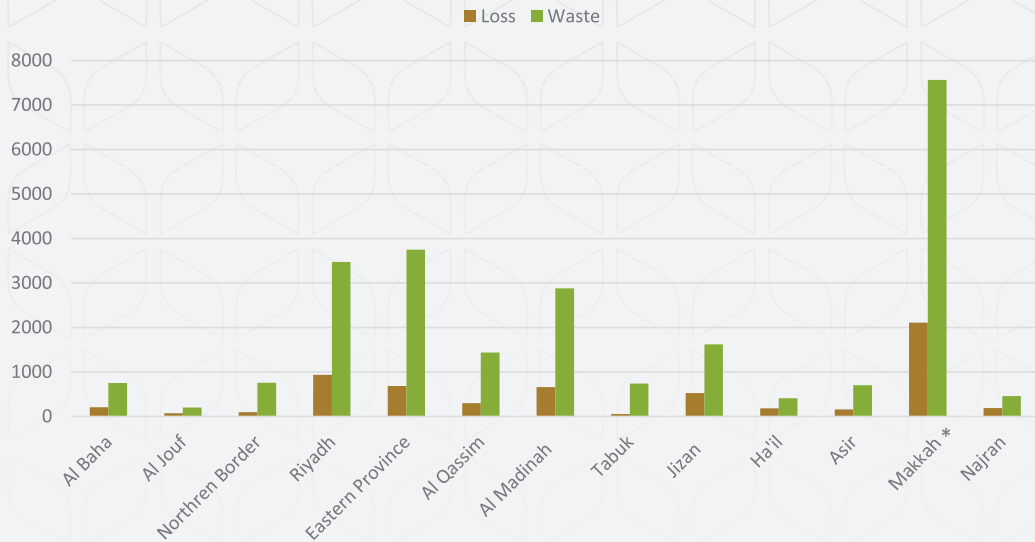

| Region           | Loss  | Waste  | Total  |
|------------------|-------|--------|--------|
| Al Baha          | 207   | 748    | 955    |
| Al Jouf          | 71    | 199    | 270    |
| Northren Border  | 99    | 758    | 857    |
| Riyadh           | 932   | 3,472  | 4,404  |
| Eastern Province | 683   | 3,750  | 4,433  |
| Al Qassim        | 297   | 1,433  | 1,730  |
| Al Madinah       | 656   | 2,878  | 3,534  |
| Tabuk            | 52    | 737    | 789    |
| Jizan            | 527   | 1,622  | 2,149  |
| Ha'il            | 181   | 407    | 588    |
| Asir             | 159   | 700    | 859    |
| Makkah *         | 2,111 | 7,563  | 9,674  |
| Najran           | 187   | 460    | 647    |
| Total            | 6,162 | 24,727 | 30,889 |

\* The increase in the samples of Makkah region because it contains three major cities (Makkah, Jeddah and Taif)

## Distribution of Samples by Region

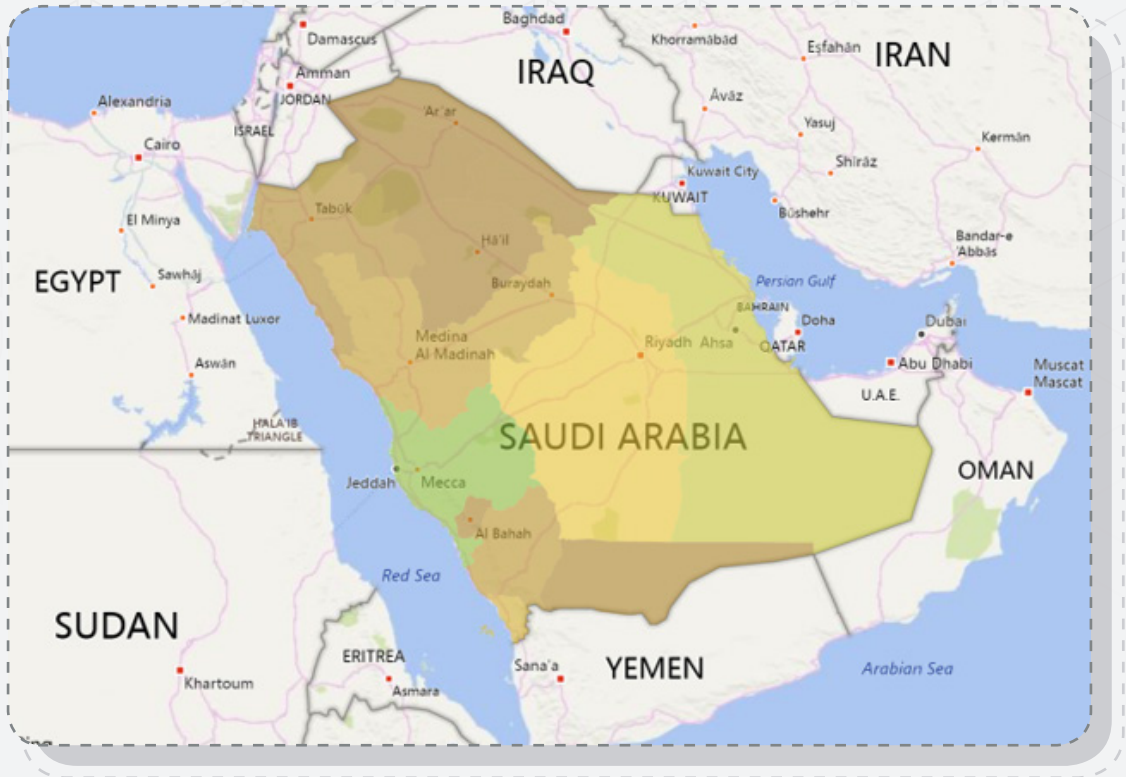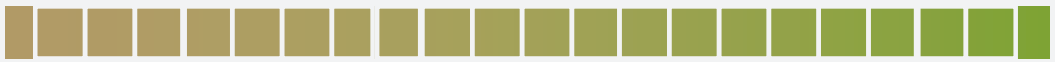

Min

Max

## Distribution of Samples by City

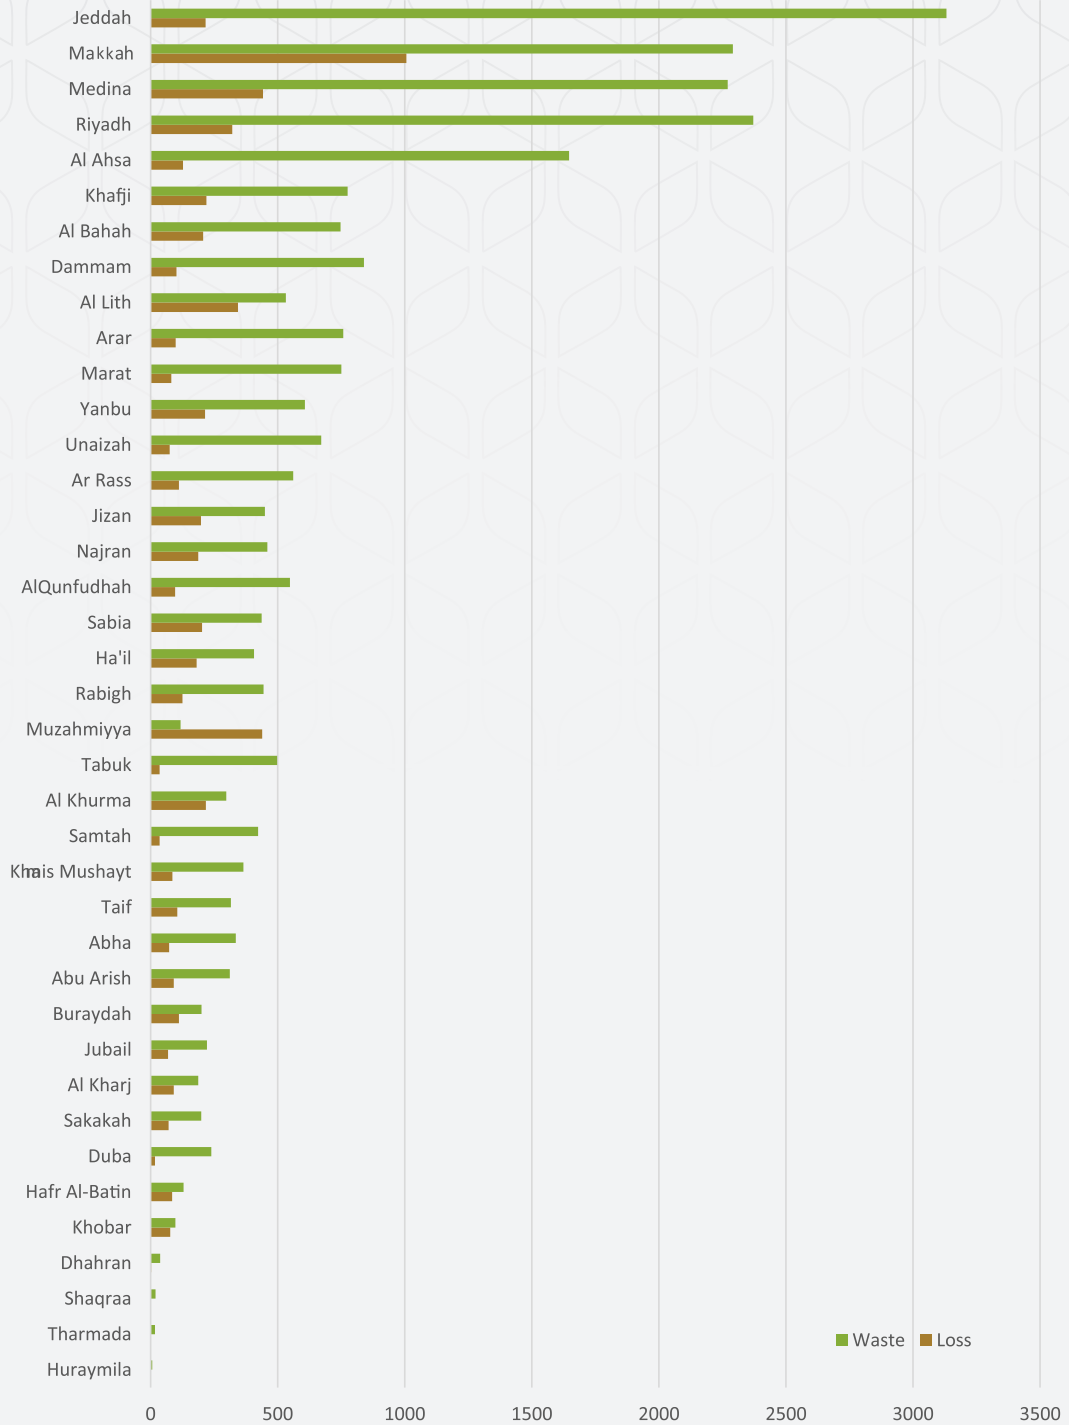

\* (Dhahran - Shagraa - Tharmadha - Huraymila) didn't add to the total cities included in the survey because their pilot study & main study samples were incomplete ( for 14 days ) .



## Distribution of Samples by City

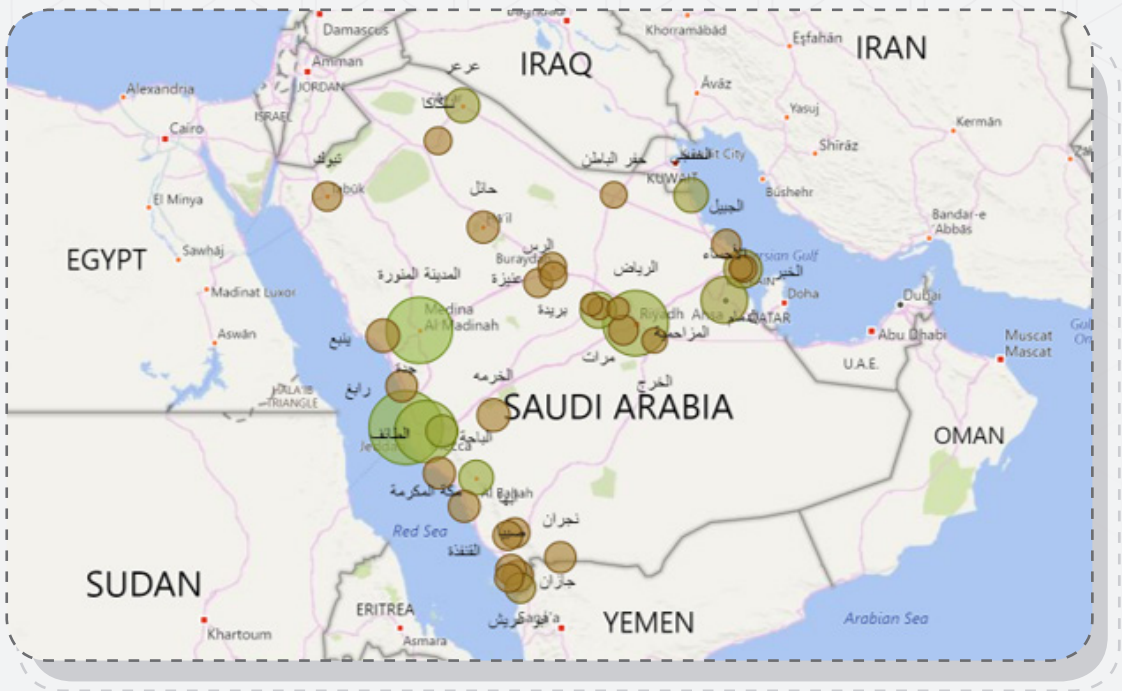

## Distribution of Flour & Bread Sample by Region

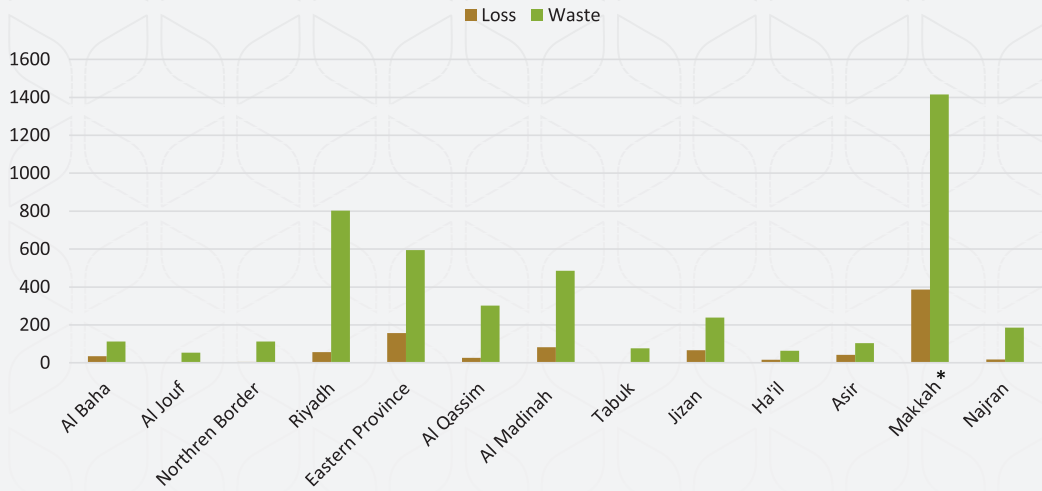

| Region           | Loss       | Waste        | Total        |
|------------------|------------|--------------|--------------|
| Al Baha          | 35         | 113          | 148          |
| Al Jouf          | 0          | 54           | 54           |
| Northren Border  | 4          | 113          | 117          |
| Riyadh           | 56         | 803          | 859          |
| Eastern Province | 157        | 594          | 751          |
| Al Qassim        | 26         | 302          | 328          |
| Al Madinah       | 82         | 486          | 568          |
| Tabuk            | 0          | 77           | 77           |
| Jizan            | 67         | 238          | 305          |
| Ha'il            | 16         | 63           | 79           |
| Asir             | 42         | 104          | 146          |
| Makkah*          | 386        | 1,416        | 1,802        |
| Najran           | 17         | 186          | 203          |
| <b>Total</b>     | <b>888</b> | <b>4,549</b> | <b>5,437</b> |

\* The increase in the samples of Makkah region because it contains three major cities (Makkah, Jeddah and Taif)

## Distribution of Fruits Sample by Region

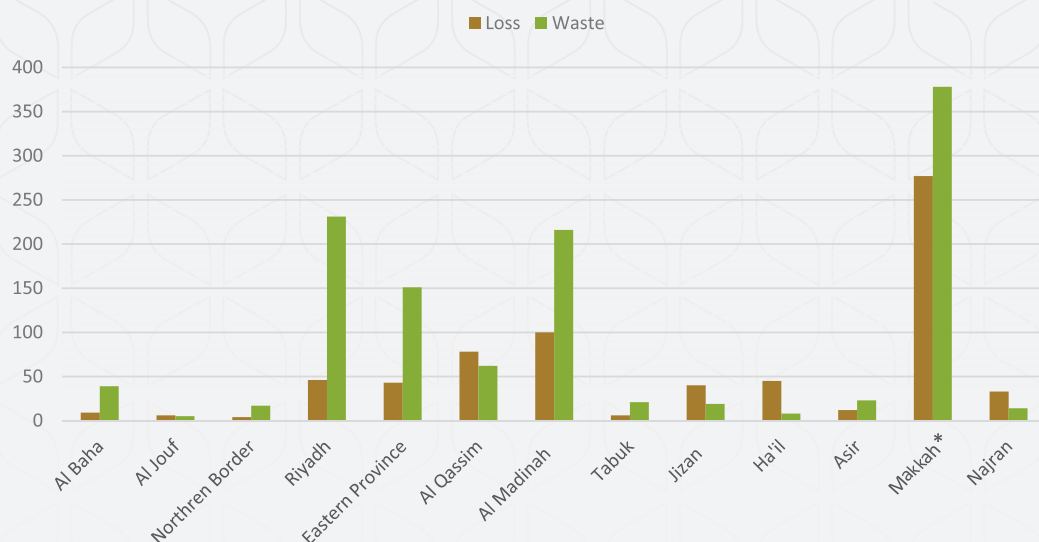

| Region           | Loss | Waste | Total |
|------------------|------|-------|-------|
| Al Baha          | 9    | 39    | 48    |
| Al Jouf          | 6    | 5     | 11    |
| Northren Border  | 4    | 17    | 21    |
| Riyadh           | 46   | 231   | 277   |
| Eastern Province | 43   | 151   | 194   |
| Al Qassim        | 78   | 62    | 140   |
| Al Madinah       | 100  | 216   | 316   |
| Tabuk            | 6    | 21    | 27    |
| Jizan            | 40   | 19    | 59    |
| Ha'il            | 45   | 8     | 53    |
| Asir             | 12   | 23    | 35    |
| Makkah*          | 277  | 378   | 655   |
| Najran           | 33   | 14    | 47    |
| Total            | 699  | 1,184 | 1,883 |

## Distribution of Rice Sample by Region

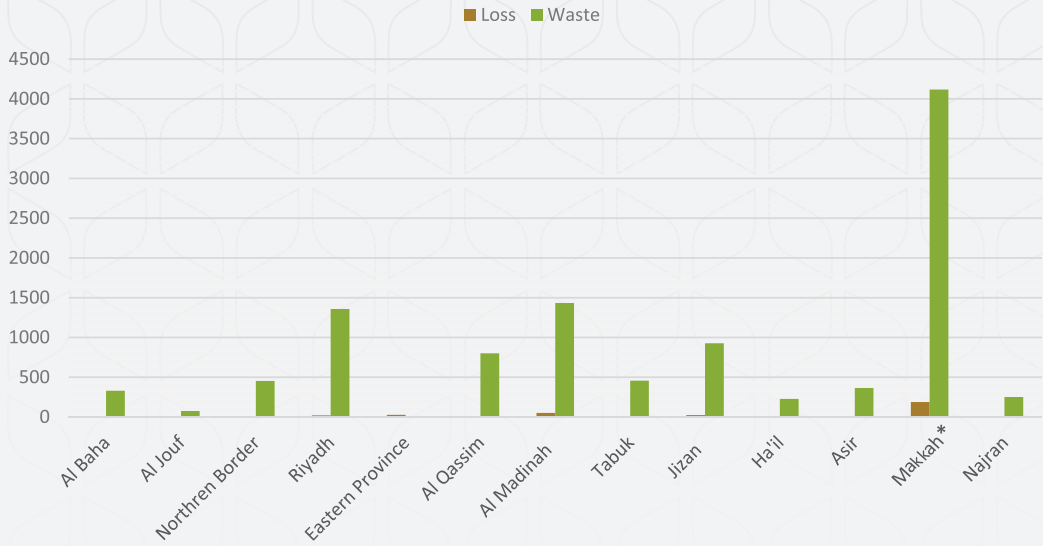

| Region           | Loss       | Waste         | Total         |
|------------------|------------|---------------|---------------|
| Al Baha          | 1          | 330           | 331           |
| Al Jouf          | 6          | 75            | 81            |
| Northren Border  | 0          | 453           | 453           |
| Riyadh           | 19         | 1,357         | 1,376         |
| Eastern Province | 27         | 1,818         | 1,845         |
| Al Qassim        | 1          | 799           | 800           |
| Al Madinah       | 50         | 1,433         | 1,483         |
| Tabuk            | 0          | 455           | 455           |
| Jizan            | 23         | 926           | 949           |
| Ha'il            | 6          | 226           | 232           |
| Asir             | 8          | 363           | 371           |
| Makkah*          | 188        | 4,116         | 4,304         |
| Najran           | 3          | 250           | 253           |
| <b>Total</b>     | <b>332</b> | <b>12,601</b> | <b>12,933</b> |

## Distribution of Vegetables Sample by Region

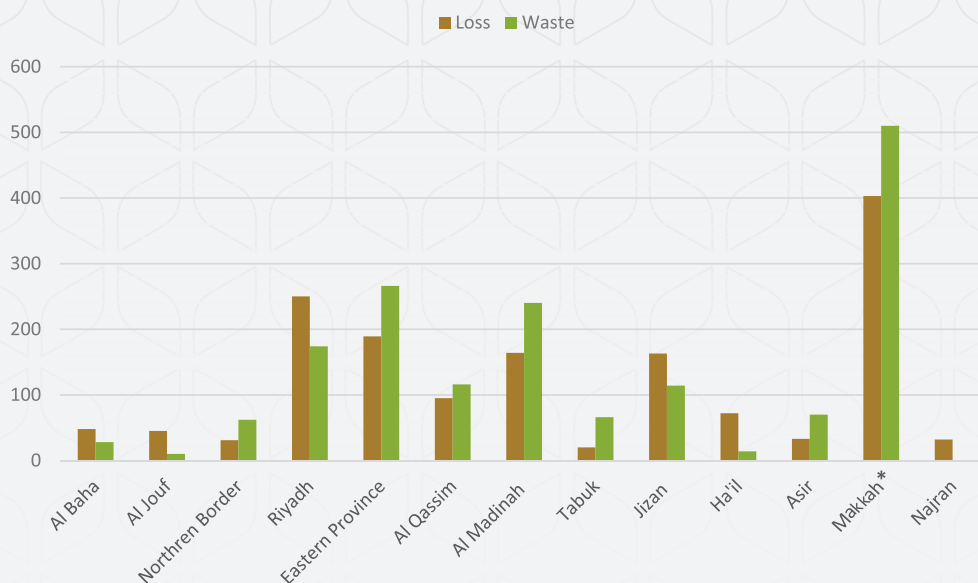

| Region           | Loss  | Waste | Total |
|------------------|-------|-------|-------|
| Al Baha          | 48    | 28    | 76    |
| Al Jouf          | 45    | 10    | 55    |
| Northren Border  | 31    | 62    | 93    |
| Riyadh           | 250   | 174   | 424   |
| Eastern Province | 189   | 266   | 455   |
| Al Qassim        | 95    | 116   | 211   |
| Al Madinah       | 164   | 240   | 404   |
| Tabuk            | 20    | 66    | 86    |
| Jizan            | 163   | 114   | 277   |
| Ha'il            | 72    | 14    | 86    |
| Asir             | 33    | 70    | 103   |
| Makkah*          | 403   | 510   | 913   |
| Najran           | 32    | 0     | 32    |
| Total            | 1,545 | 1,670 | 3,215 |

## Distribution of Poultry Sample by Region

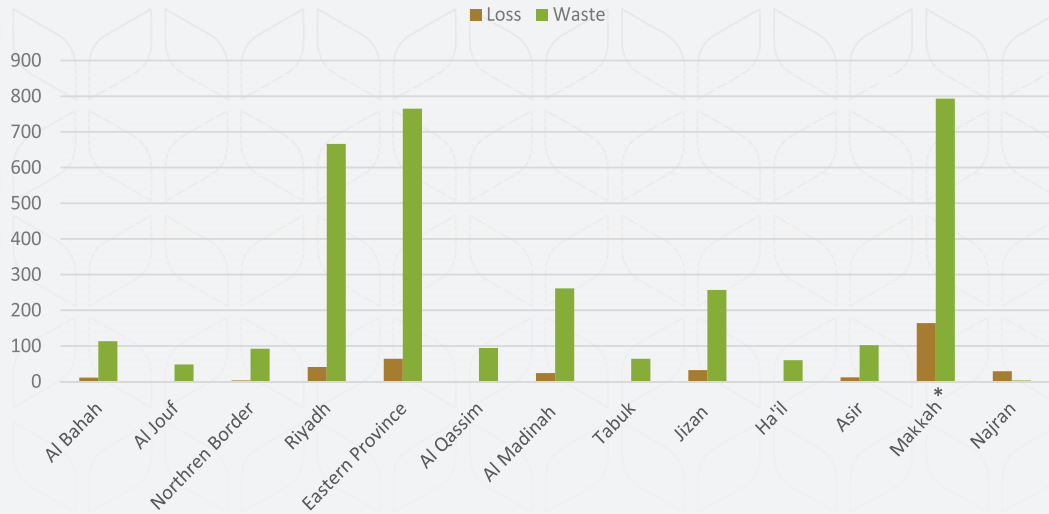

| Region           | Loss | Waste | Total |
|------------------|------|-------|-------|
| Al Bahah         | 11   | 113   | 124   |
| Al Jouf          | 0    | 48    | 48    |
| Northren Border  | 3    | 92    | 95    |
| Riyadh           | 41   | 666   | 707   |
| Eastern Province | 64   | 765   | 829   |
| Al Qassim        | 0    | 94    | 94    |
| Al Madinah       | 24   | 261   | 285   |
| Tabuk            | 0    | 64    | 64    |
| Jizan            | 32   | 257   | 289   |
| Ha'il            | 0    | 60    | 60    |
| Asir             | 12   | 102   | 114   |
| Makkah*          | 164  | 793   | 957   |
| Najran           | 29   | 3     | 32    |
| Total            | 380  | 3,318 | 3,698 |

## Distribution of Red Meat Sample by Region

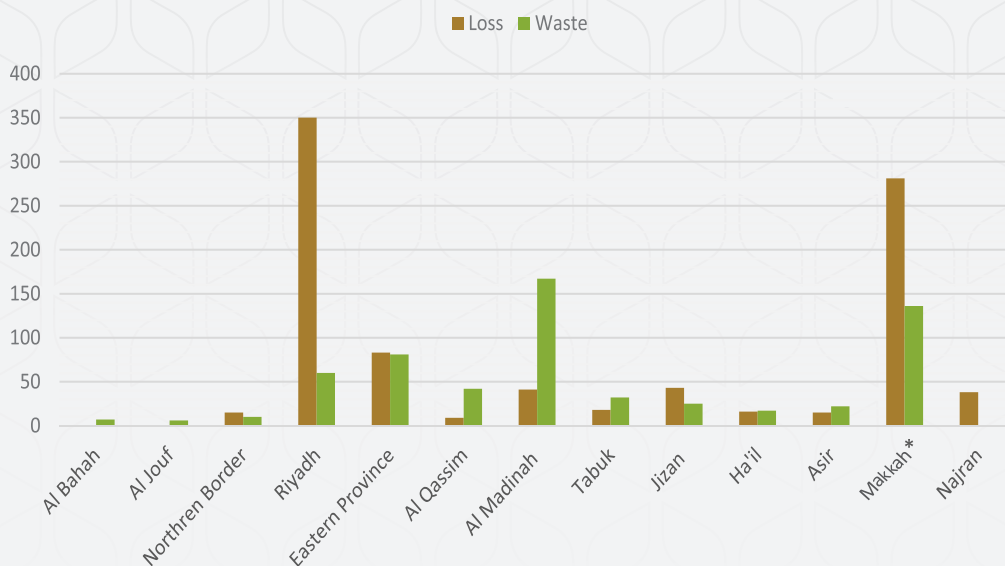

| Region           | Loss | Waste | Total |
|------------------|------|-------|-------|
| Al Bahah         | 0    | 7     | 7     |
| Al Jouf          | 0    | 6     | 6     |
| Northren Border  | 15   | 10    | 25    |
| Riyadh           | 350  | 60    | 410   |
| Eastern Province | 83   | 81    | 164   |
| Al Qassim        | 9    | 42    | 51    |
| Al Madinah       | 41   | 167   | 208   |
| Tabuk            | 18   | 32    | 50    |
| Jizan            | 43   | 25    | 68    |
| Ha'il            | 16   | 17    | 33    |
| Asir             | 15   | 22    | 37    |
| Makkah*          | 281  | 136   | 417   |
| Najran           | 38   | 0     | 38    |
| Total            | 909  | 605   | 1,514 |

## Distribution of Fish Sample by Region

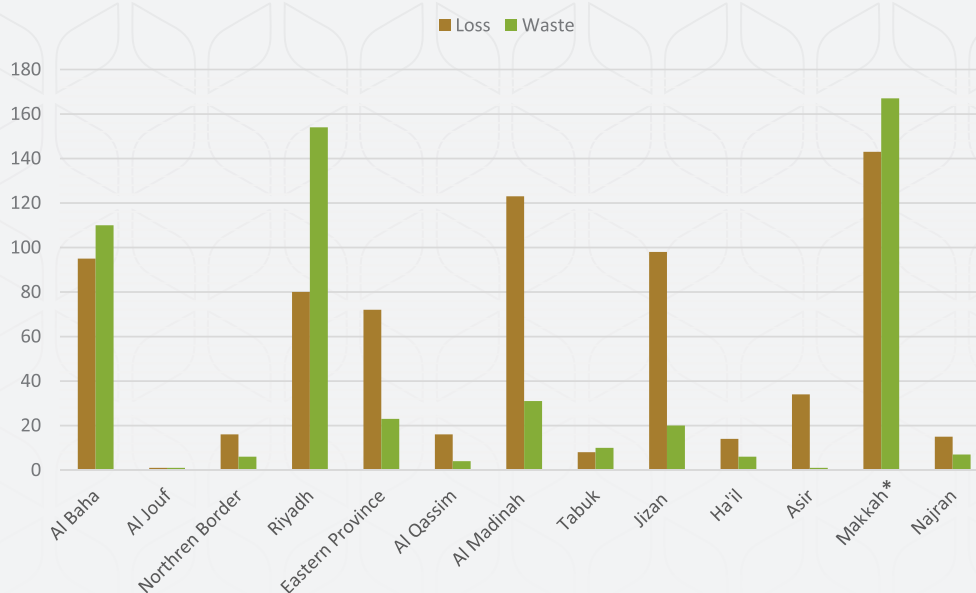

| Region           | Loss | Waste | Total |
|------------------|------|-------|-------|
| Al Baha          | 95   | 110   | 205   |
| Al Jouf          | 1    | 1     | 2     |
| Northren Border  | 16   | 6     | 22    |
| Riyadh           | 80   | 154   | 234   |
| Eastern Province | 72   | 23    | 95    |
| Al Qassim        | 16   | 4     | 20    |
| Al Madinah       | 123  | 31    | 154   |
| Tabuk            | 8    | 10    | 18    |
| Jizan            | 98   | 20    | 118   |
| Ha'il            | 14   | 6     | 20    |
| Asir             | 34   | 1     | 35    |
| Makkah*          | 143  | 167   | 310   |
| Najran           | 15   | 7     | 22    |
| Total            | 715  | 540   | 1,255 |



## Distribution of Dates Sample by Region

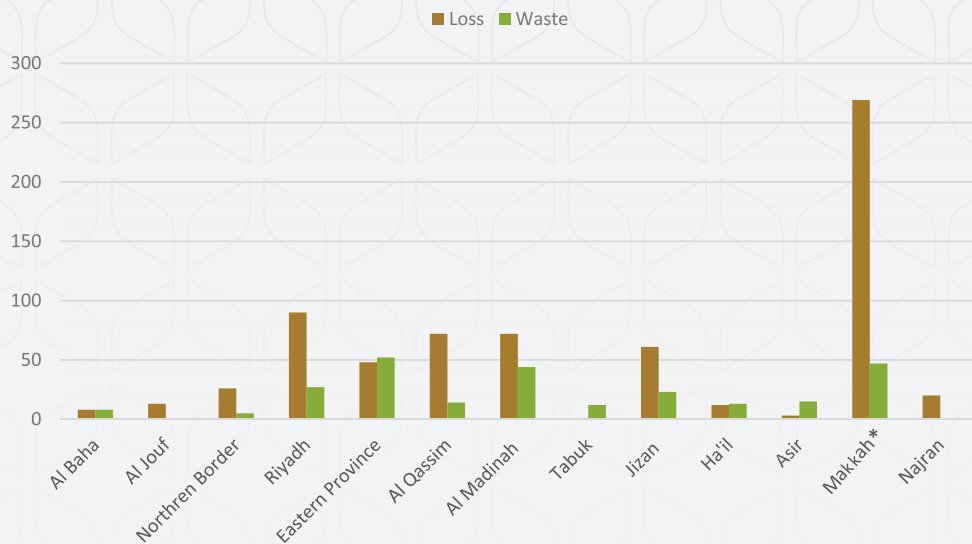

| Region           | Loss | Waste | Total |
|------------------|------|-------|-------|
| Al Baha          | 8    | 8     | 16    |
| Al Jouf          | 13   | 0     | 13    |
| Northren Border  | 26   | 5     | 31    |
| Riyadh           | 90   | 27    | 117   |
| Eastern Province | 48   | 52    | 100   |
| Al Qassim        | 72   | 14    | 86    |
| Al Madinah       | 72   | 44    | 116   |
| Tabuk            | 0    | 12    | 12    |
| Jizan            | 61   | 23    | 84    |
| Ha'il            | 12   | 13    | 25    |
| Asir             | 3    | 15    | 18    |
| Makkah*          | 269  | 47    | 316   |
| Najran           | 20   | 0     | 20    |
| Total            | 694  | 260   | 954   |

البرنامج الوطني للحد من  
الفقد والهدر في الغذاء  
بالمملكة العربية السعودية

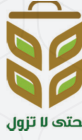

المؤسسة العامة للحبوب  
Saudi Grains Organization (SAGO)  
المملكة العربية السعودية

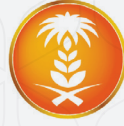

لا إله إلا الله محمد رسول الله

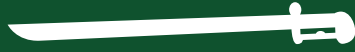

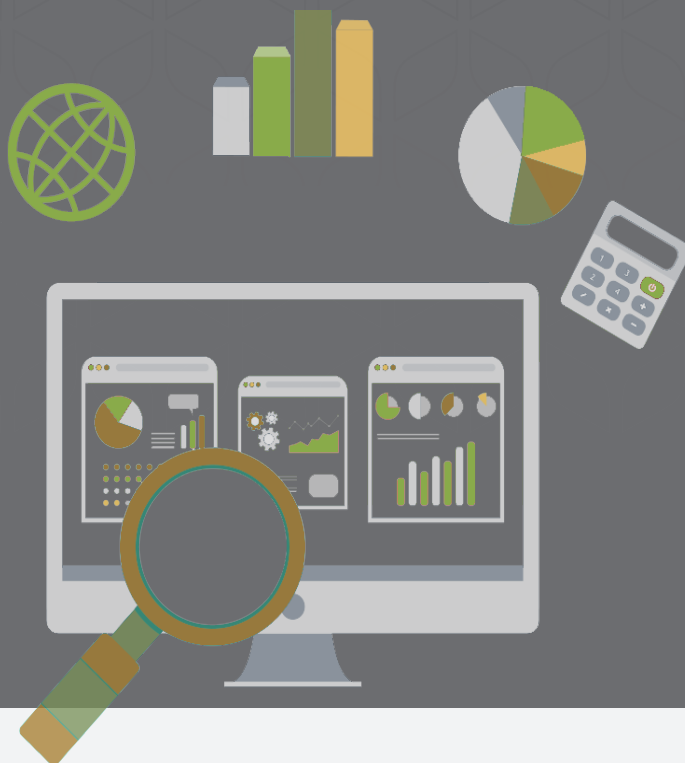

**National Program for  
Reducing FLW in KSA**

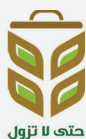

**المؤسسة العامة للحبوب**  
Saudi Grains Organization (SAGO)  
المملكة العربية السعودية

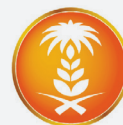

# 3<sup>rd</sup>

## Chapter

### Results of Food Loss & waste index "Saudi FLW-Baseline"

#### **Saudi FLW Baseline**

**Food Loss & Waste index  
In Kingdom of Saudi Arabia**

## Total FLW ratios for Study Products

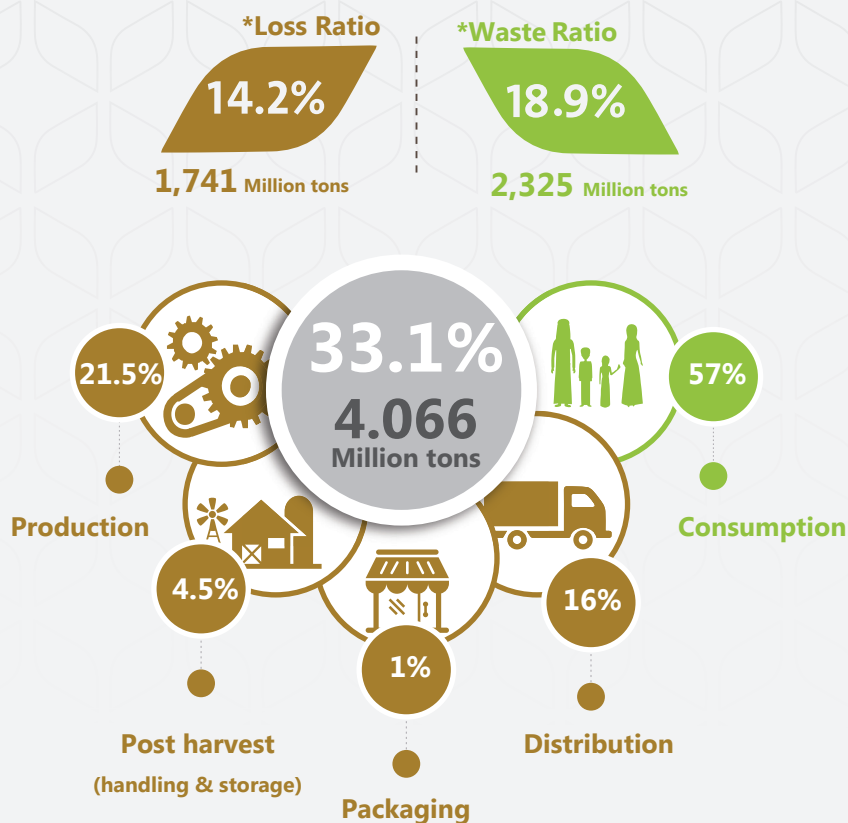

\*\*\* The total FLW per capita **184** Kgs/year \*\*\*\*

**79**  
Loss Size

**105**  
Waste Size

\*\* The total value of FLW

**12,980** Million SR/year

\*FLW ratios is calculated according to international FLW protocol, 2016, pages (16-19).

\*\*The value of FLW was calculated according to the data from General Authority for Statistics,2016,page (65).

\*\*\*The total per capita in FLW was calculated according to the formula on page (19) based on the population of KSA , 2018, reached (33 million) according to General Authority for Statistics website.

\*\*\*\*The total per capita in FLW includes all the food products in the KSA that was included in the study and not included (e.g. dairy products, eggs, sugar, milk, tea and spices) according to the international FLW protocol.

**The estimated waste value of all food products** According to consumer spending in ksa

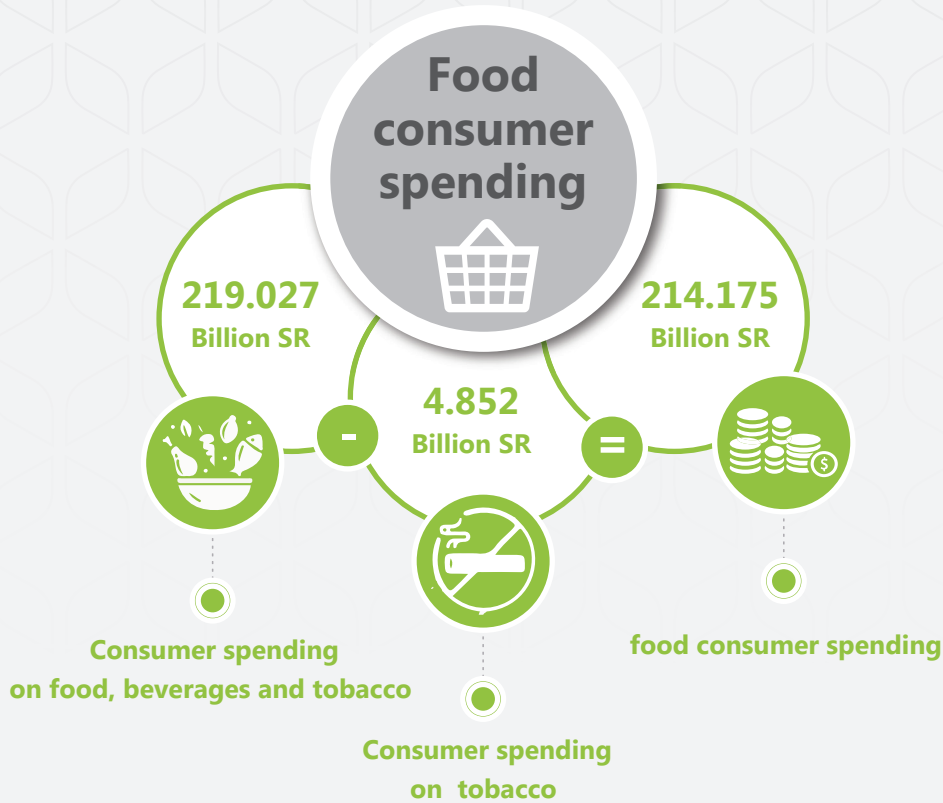

**Food Waste Ratio**

**18.9%**

**The total value of waste according to consumer spending**

**40.480** Million SR/year

\* General Authority for Statistics,( GDP & consumer spending, 2016).

## FLW Ratio For Each Product

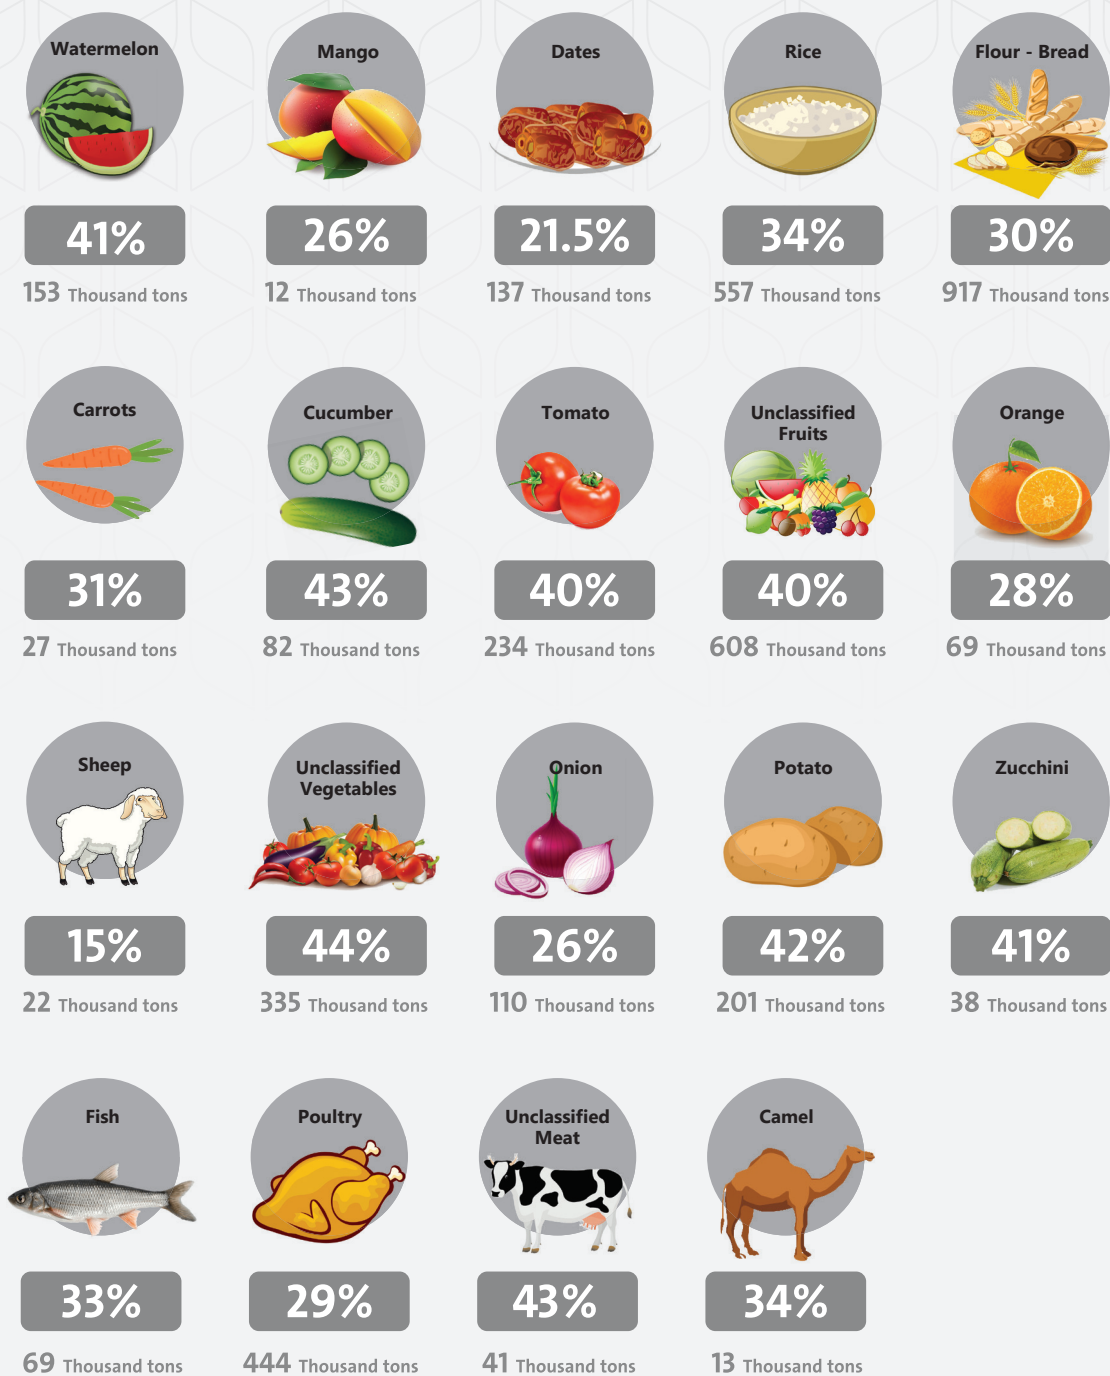

## FLW Ratio For Each Product

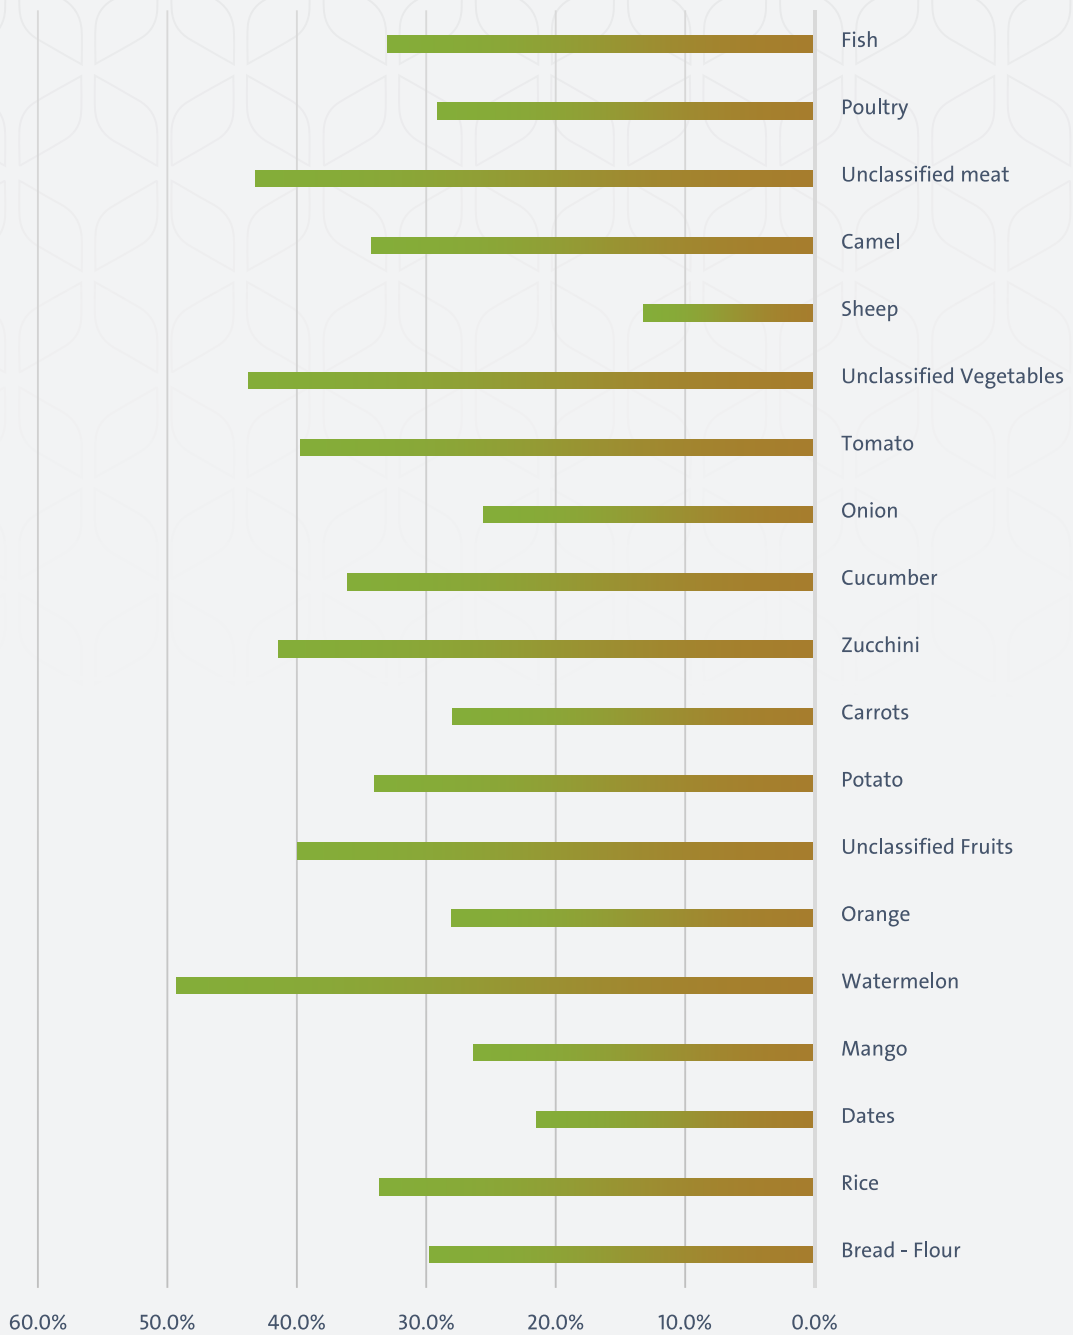



## Food loss - Waste Ratio For Each Product

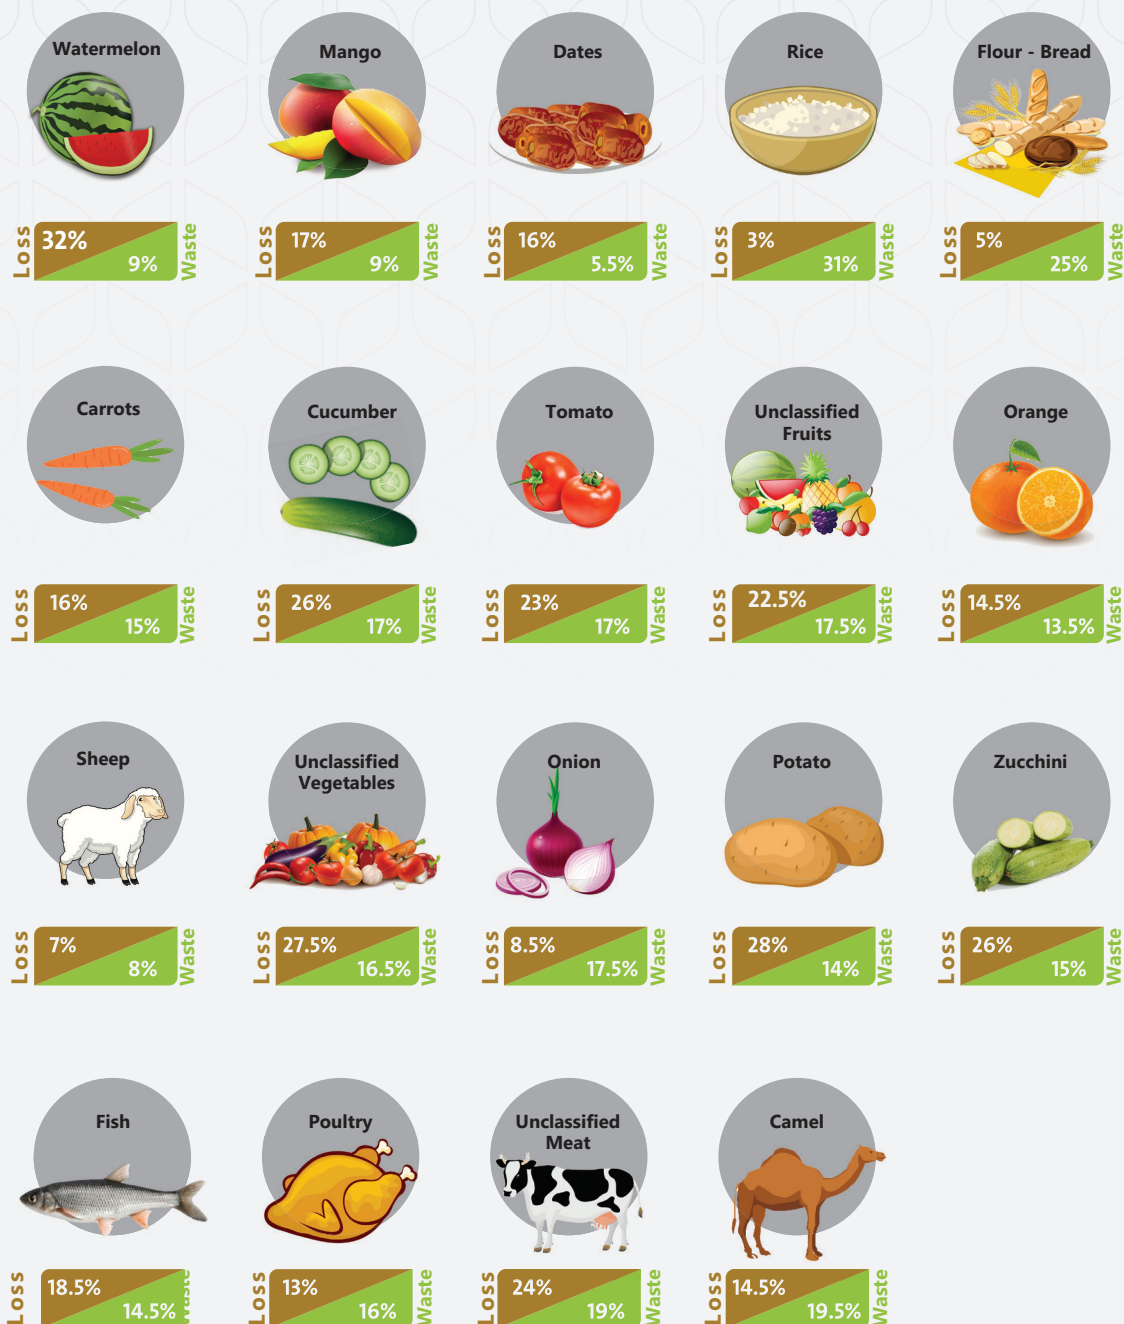

## Food loss - Waste Ratio For Each Product

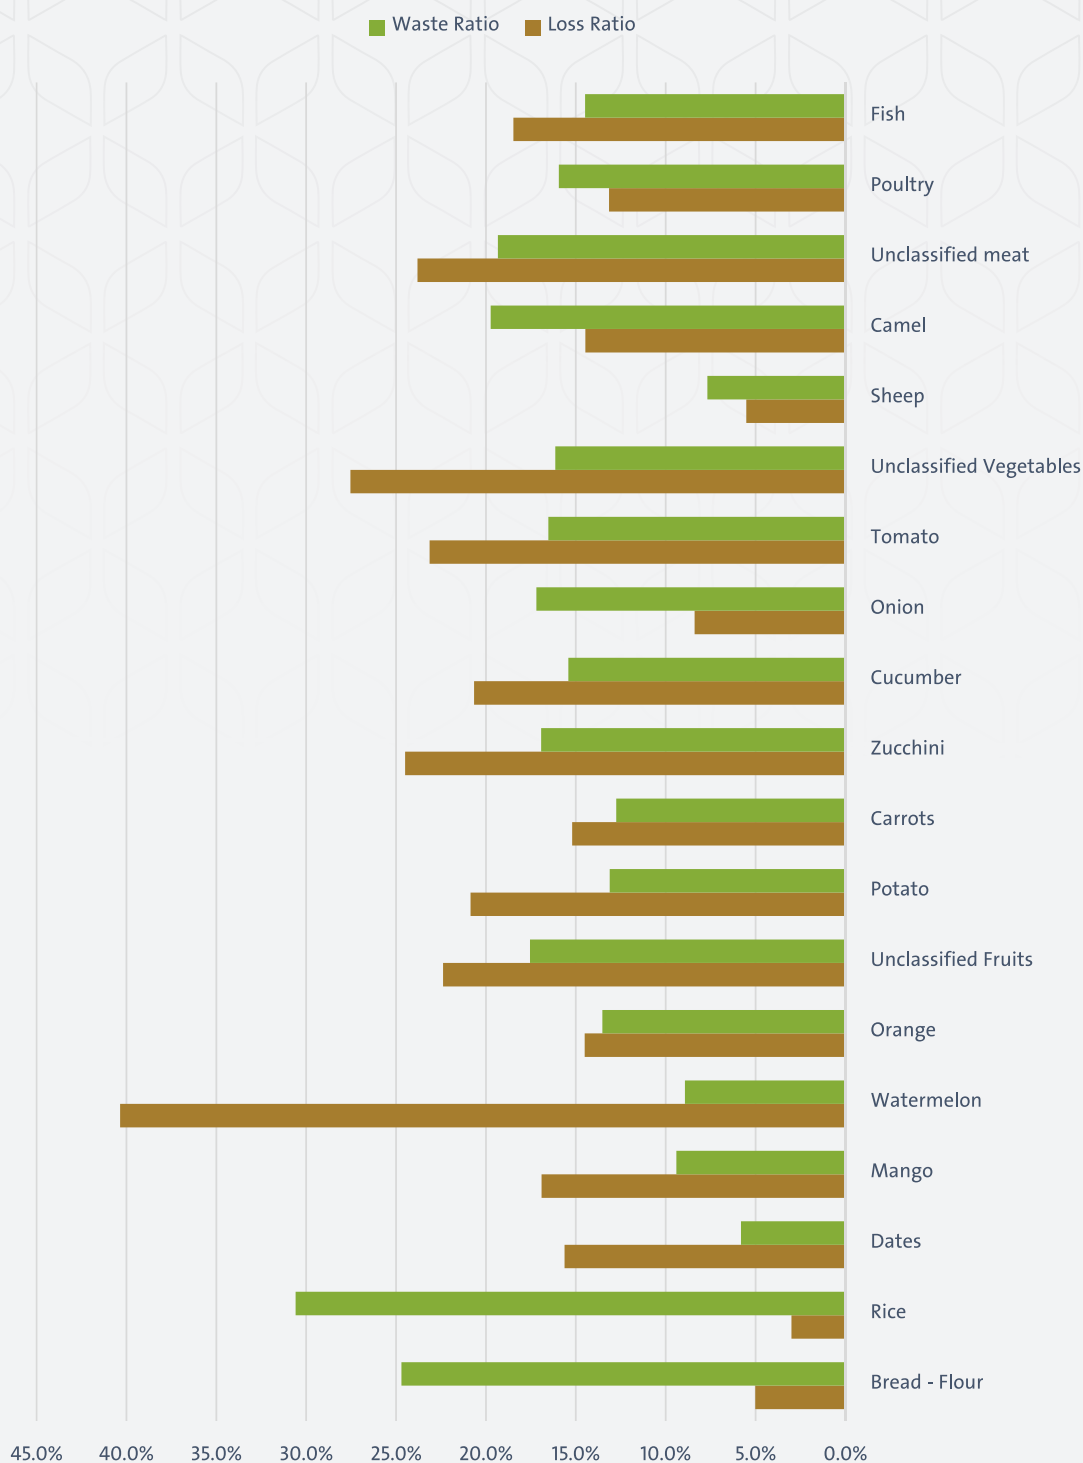

## Loss - Waste Ratios for ( Flour - Bread )

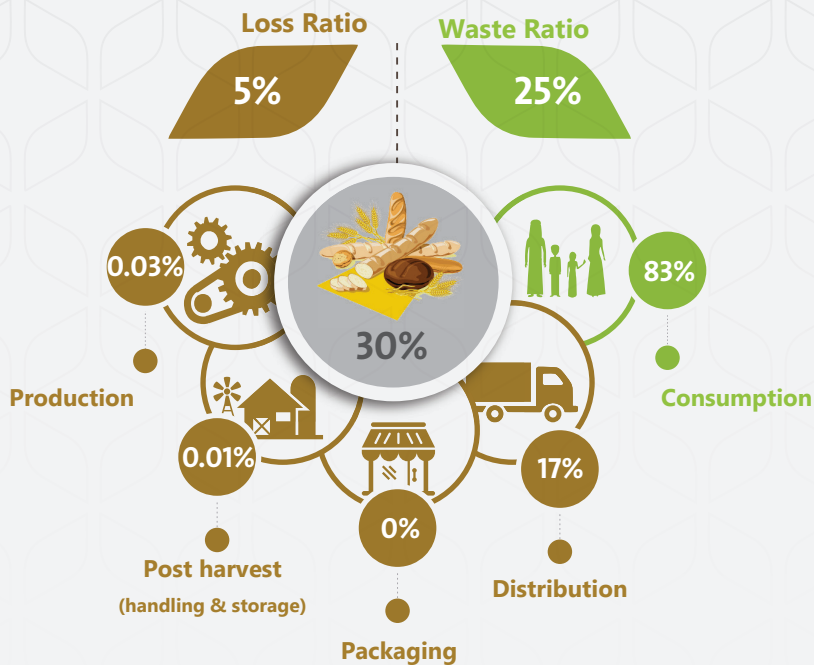

| Food Supply chain                 | FLW Ratio* | FLW amount<br>(Thousand tons) |
|-----------------------------------|------------|-------------------------------|
| Production                        | 0.03%      | 0.319                         |
| Post harvest (handling & storage) | 0.01%      | 0.103                         |
| Packaging                         | 0%         | 0.000                         |
| Distribution                      | 17%        | 154.265                       |
| Consumption                       | 83%        | 762.071                       |

The total FLW per capita **28** Kgs/year

**5**  
Loss Size

**23**  
Waste Size

The total value of FLW for product

**913** Million SR/year

\* FLW Ratio represents from the total Food Loss & waste of the product.

## Loss - Waste Ratios for ( Rice )

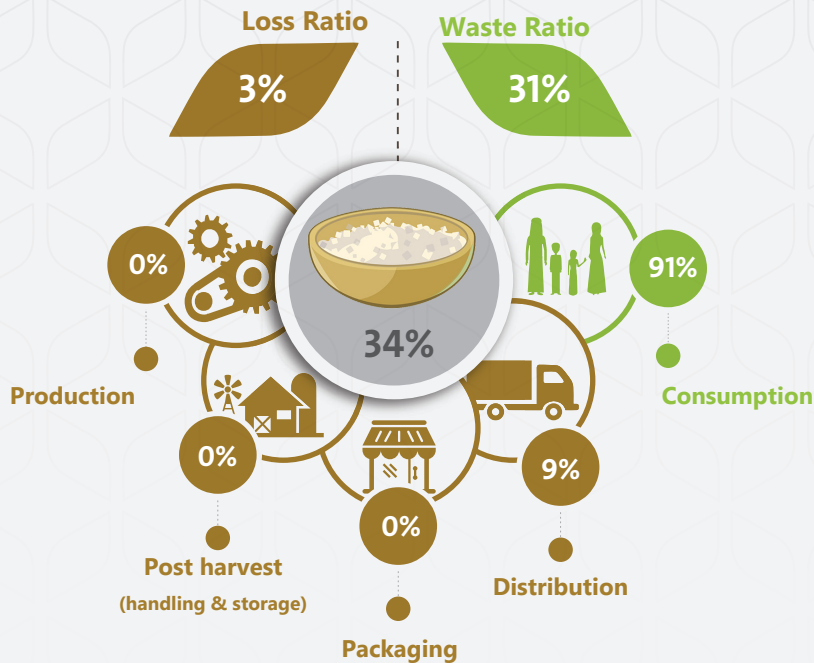

| Food Supply chain                 | FLW Ratio | FLW amount<br>(Thousand tons) |
|-----------------------------------|-----------|-------------------------------|
| Production                        | 0%        | 0.000                         |
| Post harvest (handling & storage) | 0%        | 0.000                         |
| Packaging                         | 0%        | 0.000                         |
| Distribution                      | 9%        | 49.740                        |
| Consumption                       | 91%       | 507.117                       |

The total FLW per capita **17** Kgs/year

**2**  
Loss Size

**15**  
Waste Size

The total value of FLW for product

**1.682** Million SR/year

## Loss - Waste Ratios for ( Dates )

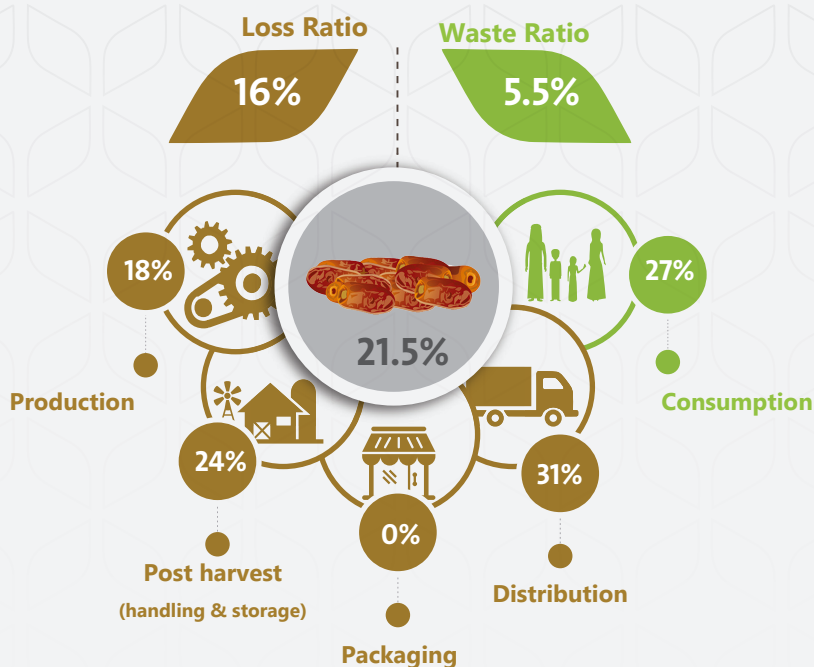

| Food Supply chain                 | FLW Ratio | FLW amount<br>(Thousand tons) |
|-----------------------------------|-----------|-------------------------------|
| Production                        | 18%       | 24.873                        |
| Post harvest (handling & storage) | 24%       | 32.235                        |
| Packaging                         | 0%        | 0.000                         |
| Distribution                      | 31%       | 42.550                        |
| Consumption                       | 27%       | 36.972                        |

The total FLW per  
capita

**5**

Kgs/year

The total value  
of FLW for product

**588**

Million SR/year

**4**  
Loss Size

**1**  
Waste Size

## Loss - Waste Ratios for ( Mango )

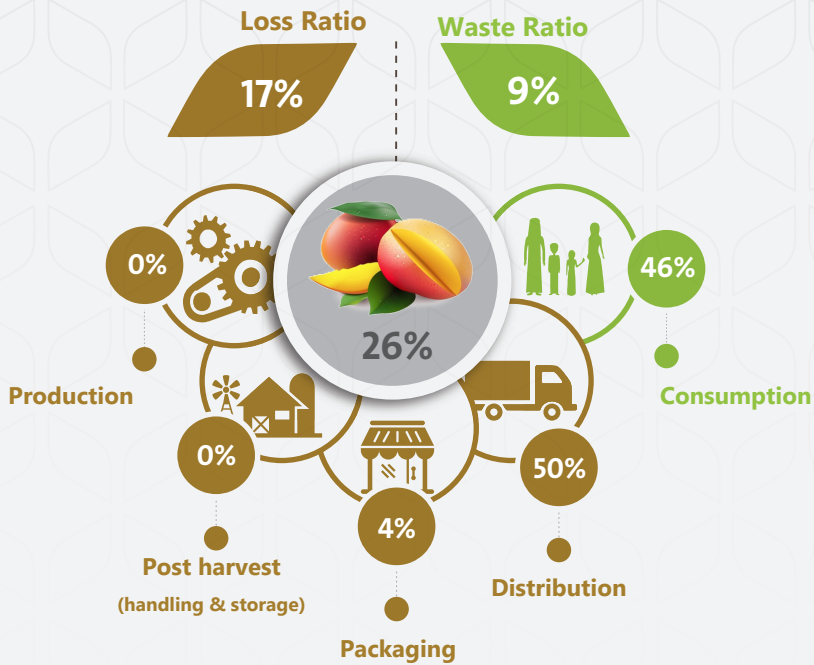

| Food Supply chain                 | FLW Ratio | FLW amount<br>(Thousand tons) |
|-----------------------------------|-----------|-------------------------------|
| Production                        | 0%        | 0.000                         |
| Post harvest (handling & storage) | 0%        | 0.000                         |
| Packaging                         | 4%        | 0.500                         |
| Distribution                      | 50%       | 5.910                         |
| Consumption                       | 46%       | 5.420                         |

The total FLW per capita **0.4** Kgs/year

**0.2**  
Loss Size

**0.2**  
Waste Size

The total value of FLW for product

**42**

Million SR/year

## Loss - Waste Ratios for ( Watermelon )

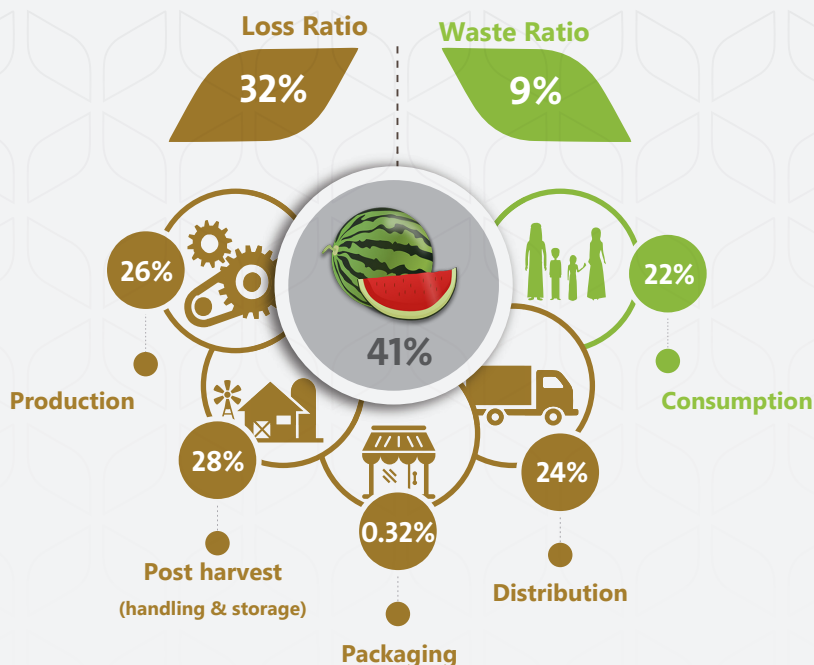

| Food Supply chain                 | FLW Ratio | FLW amount<br>(Thousand tons) |
|-----------------------------------|-----------|-------------------------------|
| Production                        | 26%       | 39.116                        |
| Post harvest (handling & storage) | 28%       | 42.603                        |
| Packaging                         | 0.32%     | 0.487                         |
| Distribution                      | 24%       | 37.369                        |
| Consumption                       | 22%       | 33.706                        |

The total FLW per  
capita

**5**  
Kgs/year

The total value  
of FLW for product

**254**  
Million SR/year

**4**  
Loss Size

**1**  
Waste Size

## Loss - Waste Ratios for ( Orange )

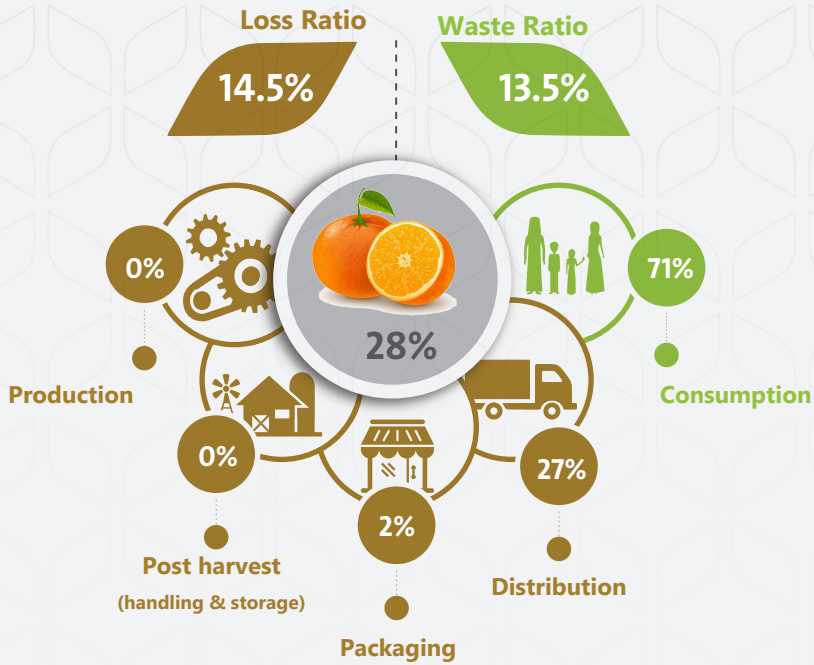

| Food Supply chain                 | FLW Ratio | FLW amount<br>(Thousand tons) |
|-----------------------------------|-----------|-------------------------------|
| Production                        | 0%        | 0.000                         |
| Post harvest (handling & storage) | 0%        | 0.000                         |
| Packaging                         | 2%        | 1.347                         |
| Distribution                      | 27%       | 18.332                        |
| Consumption                       | 71%       | 49.088                        |

The total FLW per  
capita

**3**

Kgs/year

The total value  
of FLW for product

**181**

Million SR/year

**1**  
Loss Size

**2**  
Waste Size



## Loss - Waste Ratios for ( Unclassified Fruits )

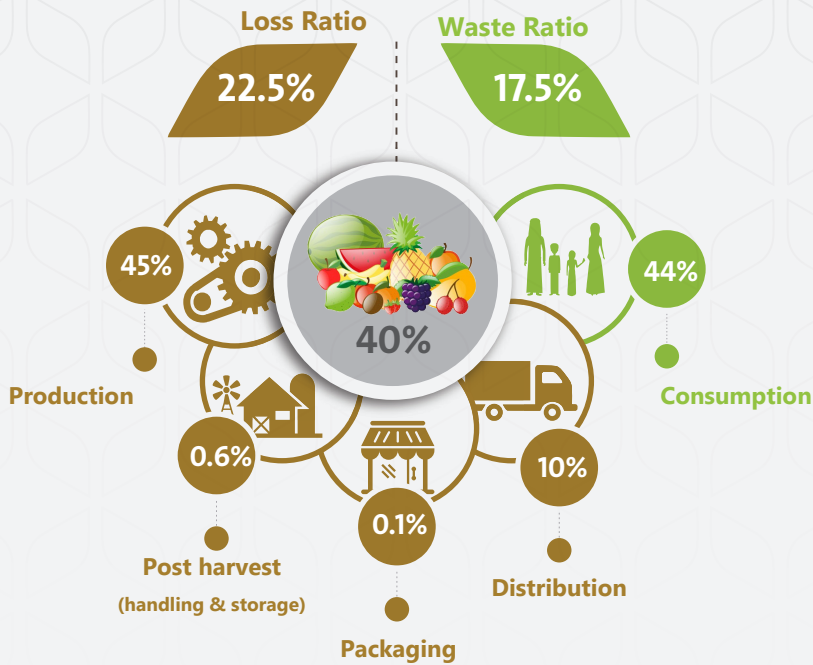

| Food Supply chain                 | FLW Ratio | FLW amount<br>(Thousand tons) |
|-----------------------------------|-----------|-------------------------------|
| Production                        | 45%       | 275.302                       |
| Post harvest (handling & storage) | 0.6%      | 3.450                         |
| Packaging                         | 0.4%      | 2.584                         |
| Distribution                      | 10%       | 59.334                        |
| Consumption                       | 44%       | 267.010                       |

The total FLW per capita **18** Kgs/year

The total value of FLW for product

**10**  
Loss Size

**8**  
Waste Size

**2,257** Million SR/year

## Loss - Waste Ratios for ( Potato )

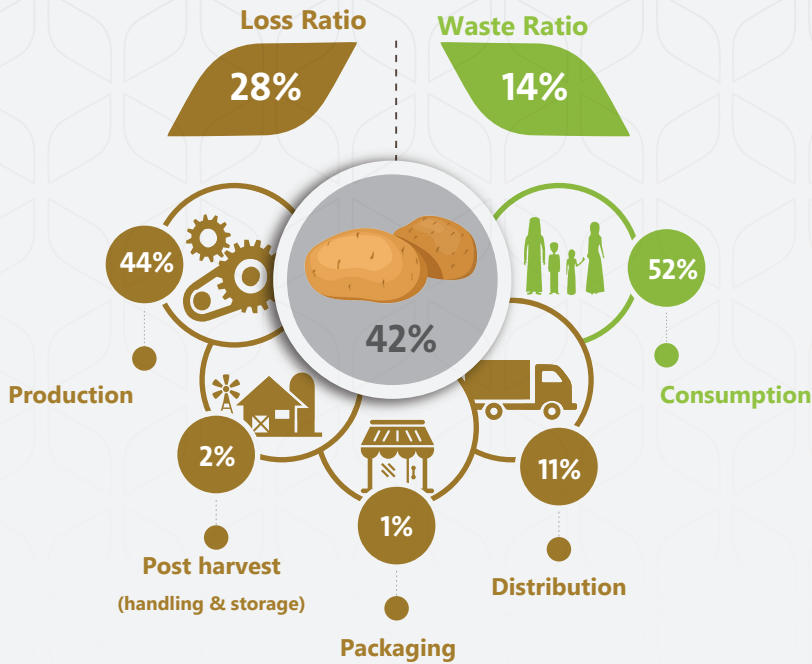

| Food Supply chain                 | FLW Ratio | FLW amount<br>(Thousand tons) |
|-----------------------------------|-----------|-------------------------------|
| Production                        | 52%       | 104.136                       |
| Post harvest (handling & storage) | 2%        | 4.165                         |
| Packaging                         | 1%        | 2.337                         |
| Distribution                      | 11%       | 22.690                        |
| Consumption                       | 34%       | 67.376                        |

The total FLW per  
capita

**6**

Kgs/year

**4**

Loss Size

**2**

Waste Size

The total value  
of FLW for product

**372**

Million SR/year

## Loss - Waste Ratios for ( Carrots )

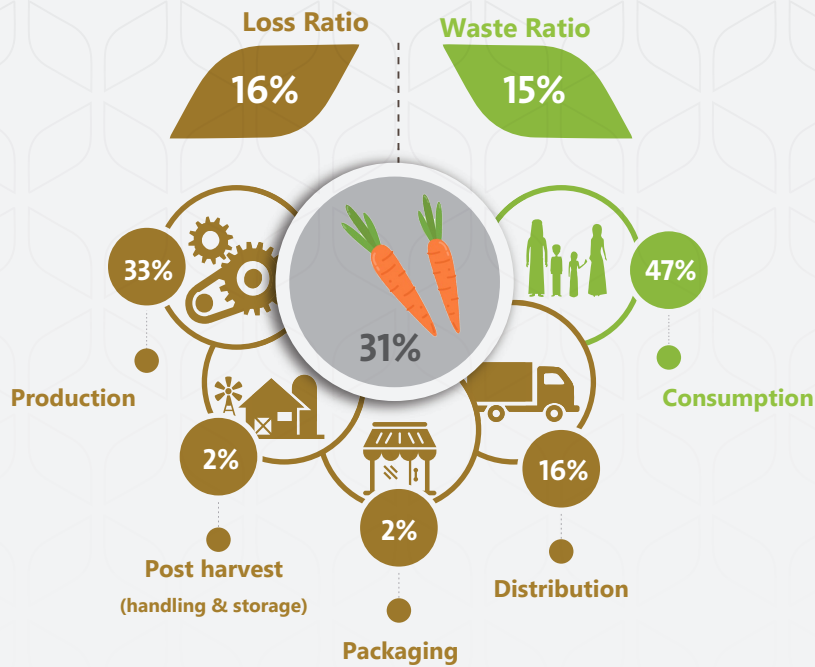

| Food Supply chain                 | FLW Ratio | FLW amount<br>(Thousand tons) |
|-----------------------------------|-----------|-------------------------------|
| Production                        | 33%       | 8.794                         |
| Post harvest (handling & storage) | 2%        | 0.440                         |
| Packaging                         | 2%        | 0.514                         |
| Distribution                      | 16%       | 4.362                         |
| Consumption                       | 47%       | 12.674                        |

The total FLW per capita **0.8** Kgs/year

The total value of FLW for product

**0.4**  
Loss Size

**0.4**  
Waste Size

**47** Million SR/year

## Loss - Waste Ratios for ( Zucchini )

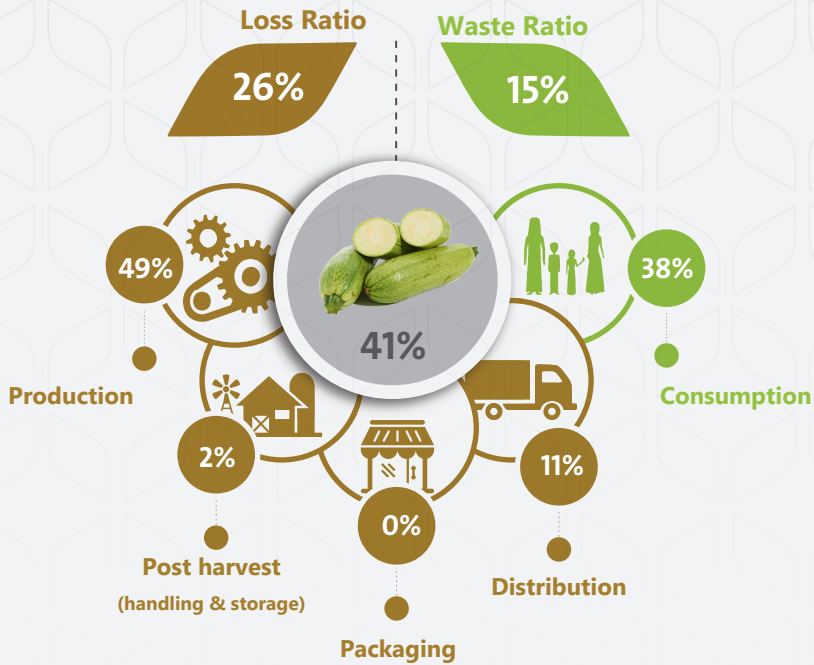

| Food Supply chain                 | FLW Ratio | FLW amount<br>(Thousand tons) |
|-----------------------------------|-----------|-------------------------------|
| Production                        | 49%       | 18.461                        |
| Post harvest (handling & storage) | 2%        | 0.923                         |
| Packaging                         | 0%        | 0.000                         |
| Distribution                      | 11%       | 4.155                         |
| Consumption                       | 38%       | 14.196                        |

The total FLW per capita **1.1** Kgs/year

The total value of FLW for product

**0.7**  
Loss Size

**0.4**  
Waste Size

**74**

Million SR/year

## Loss - Waste Ratios for ( Cucumber )

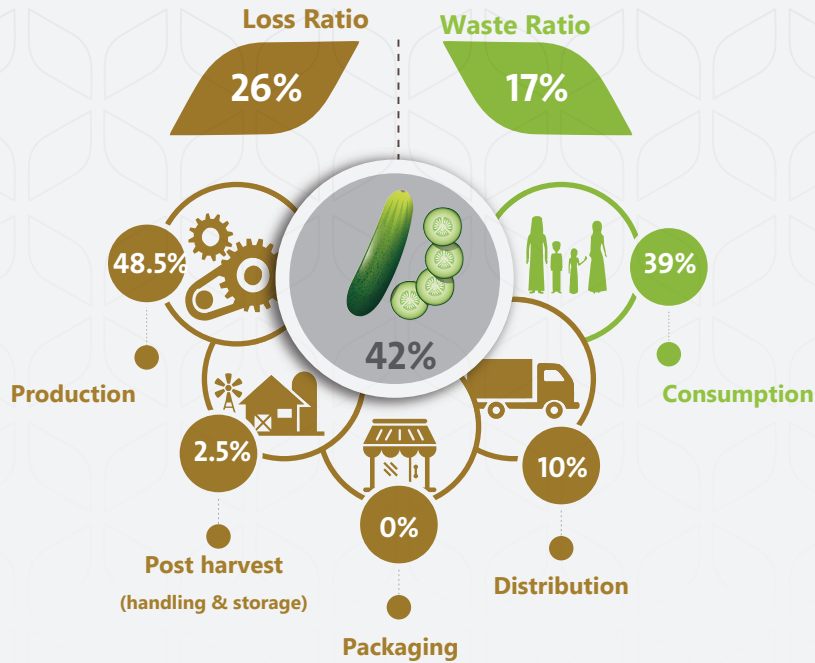

| Food Supply chain                 | FLW Ratio | FLW amount<br>(Thousand tons) |
|-----------------------------------|-----------|-------------------------------|
| Production                        | 48.5%     | 39.433                        |
| Post harvest (handling & storage) | 2.5%      | 1.972                         |
| Packaging                         | 0%        | 0.000                         |
| Distribution                      | 10%       | 8.130                         |
| Consumption                       | 39%       | 31.972                        |

The total FLW per capita

**2** Kgs/year

The total value of FLW for product

**260** Million SR/year

**1**  
Loss Size

**1**  
Waste Size

## Loss - Waste Ratios for ( Onion )

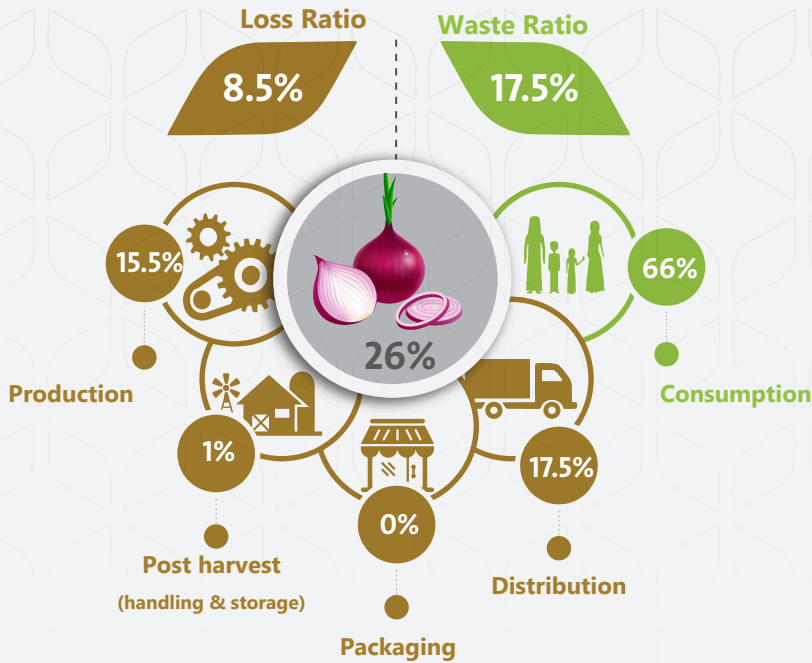

| Food Supply chain                 | FLW Ratio | FLW amount<br>(Thousand tons) |
|-----------------------------------|-----------|-------------------------------|
| Production                        | 15.5%     | 17.083                        |
| Post harvest (handling & storage) | 1%        | 0.854                         |
| Packaging                         | 0%        | 0.000                         |
| Distribution                      | 17.5%     | 19.281                        |
| Consumption                       | 66%       | 72.376                        |

The total FLW per capita **3.5** Kgs/year

**1.1**  
Loss Size

**2.4**  
Waste Size

The total value of FLW for product

**167**

Million SR/year

## Loss - Waste Ratios for ( Tomato )

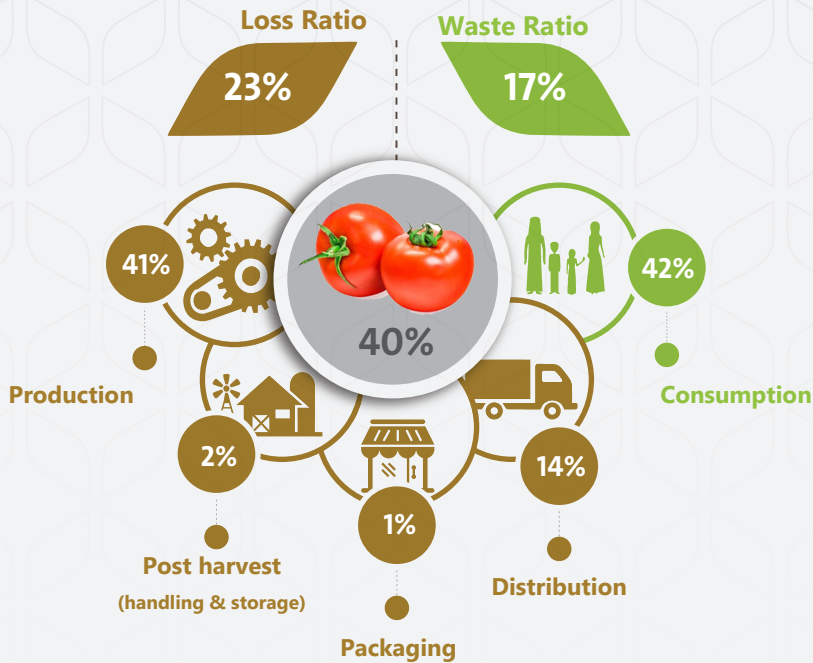

| Food Supply chain                 | FLW Ratio | FLW amount<br>(Thousand tons) |
|-----------------------------------|-----------|-------------------------------|
| Production                        | 41%       | 96.869                        |
| Post harvest (handling & storage) | 2%        | 4.843                         |
| Packaging                         | 1%        | 2.380                         |
| Distribution                      | 14%       | 31.642                        |
| Consumption                       | 42%       | 97.776                        |

The total FLW per  
capita

**8**

Kgs/year

The total value  
of FLW for product

**428**

Million SR/year

**5**

Loss Size

**3**

Waste Size

## Loss - Waste Ratios for ( Unclassified Vegetables )

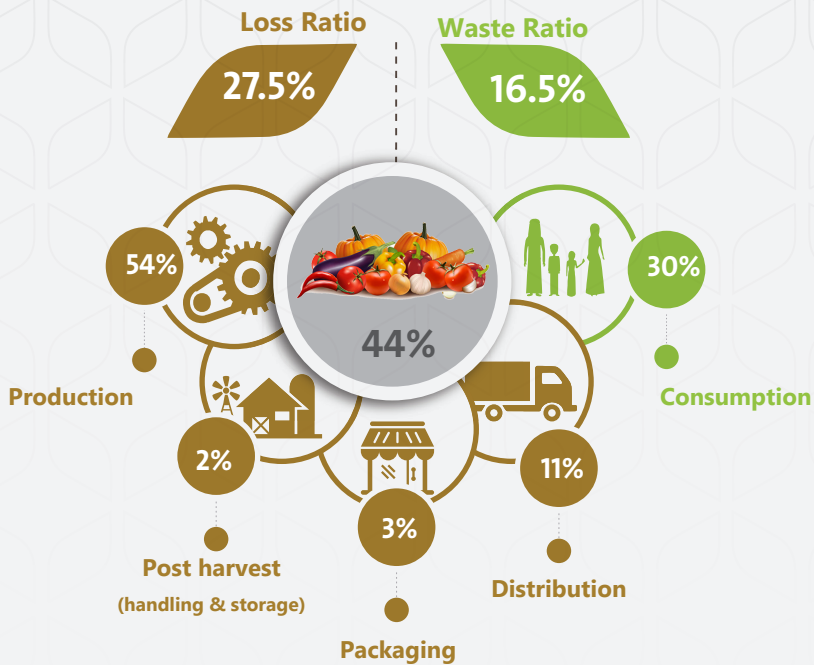

| Food Supply chain                 | FLW Ratio | FLW amount<br>(Thousand tons) |
|-----------------------------------|-----------|-------------------------------|
| Production                        | 54%       | 181.881                       |
| Post harvest (handling & storage) | 2%        | 5.469                         |
| Packaging                         | 3%        | 8.295                         |
| Distribution                      | 11%       | 37.390                        |
| Consumption                       | 30%       | 101.882                       |

The total FLW per capita **10** Kgs/year

**7**  
Loss Size

**3**  
Waste Size

The total value of FLW for product

**1,252** Million SR/year



## Loss - Waste Ratios for ( Sheep )

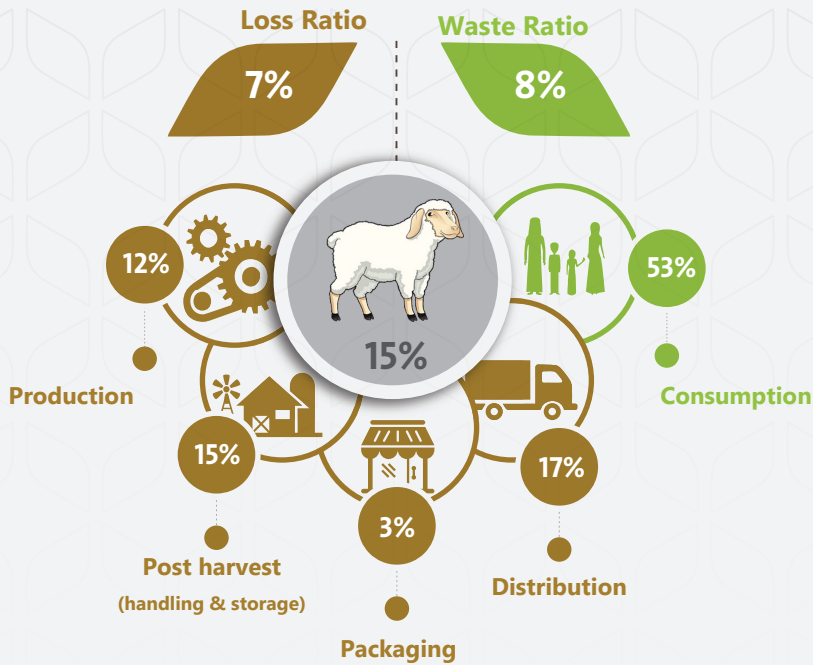

| Food Supply chain                 | FLW Ratio | FLW amount<br>(Thousand tons) |
|-----------------------------------|-----------|-------------------------------|
| Production                        | 12%       | 2.660                         |
| Post harvest (handling & storage) | 15%       | 3.334                         |
| Packaging                         | 3%        | 0.609                         |
| Distribution                      | 17%       | 3.627                         |
| Consumption                       | 53%       | 11.493                        |

The total FLW per capita **0.7** Kgs/year

The total value of FLW for product

**0.3**  
Loss Size

**0.4**  
Waste Size

**401**

Million SR/year

## Loss - Waste Ratios for ( Camel )

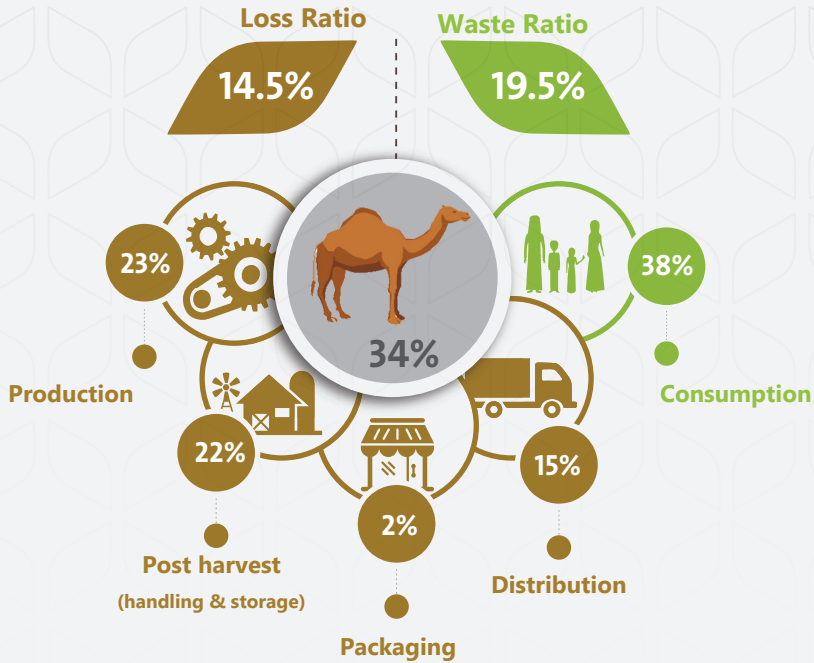

| Food Supply chain                 | FLW Ratio | FLW amount<br>(Thousand tons) |
|-----------------------------------|-----------|-------------------------------|
| Production                        | 23%       | 3.031                         |
| Post harvest (handling & storage) | 22%       | 2.909                         |
| Packaging                         | 2%        | 0.220                         |
| Distribution                      | 15%       | 1.924                         |
| Consumption                       | 38%       | 4.976                         |

The total FLW per capita

**0.4** Kgs/year

The total value of FLW for product

**150**

Million SR/year

**0.25**

Loss Size

**0.15**

Waste Size

## Loss - Waste Ratios for ( Unclassified meat )

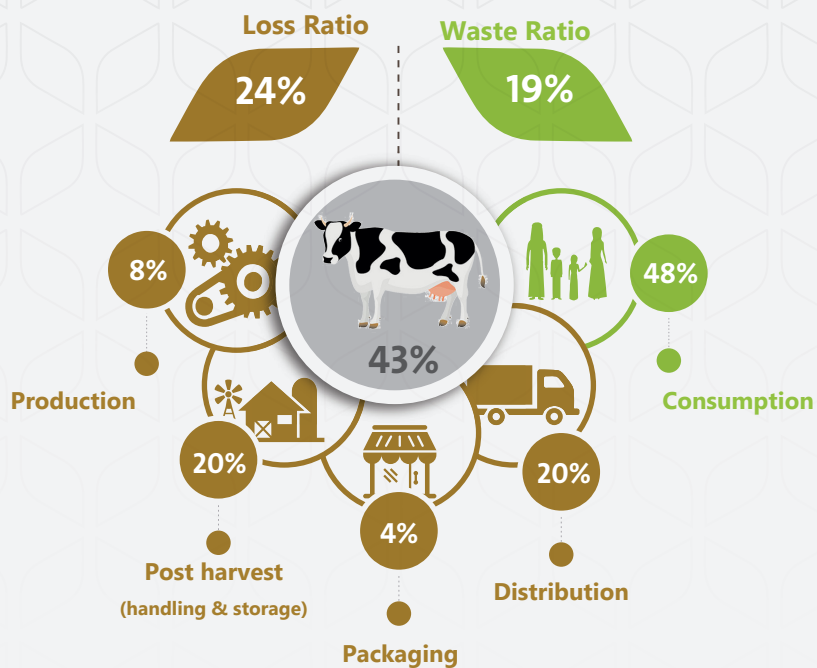

| Food Supply chain                 | FLW Ratio | FLW amount<br>(Thousand tons) |
|-----------------------------------|-----------|-------------------------------|
| Production                        | 8%        | 3.132                         |
| Post harvest (handling & storage) | 20%       | 8.353                         |
| Packaging                         | 4%        | 1.638                         |
| Distribution                      | 20%       | 8.120                         |
| Consumption                       | 48%       | 19.568                        |

The total FLW per capita **1.2** Kgs/year

**0.6**  
Loss Size

**0.6**  
Waste Size

The total value of FLW for product

**619**

Million SR/year

## Loss - Waste Ratios for ( Poultry )

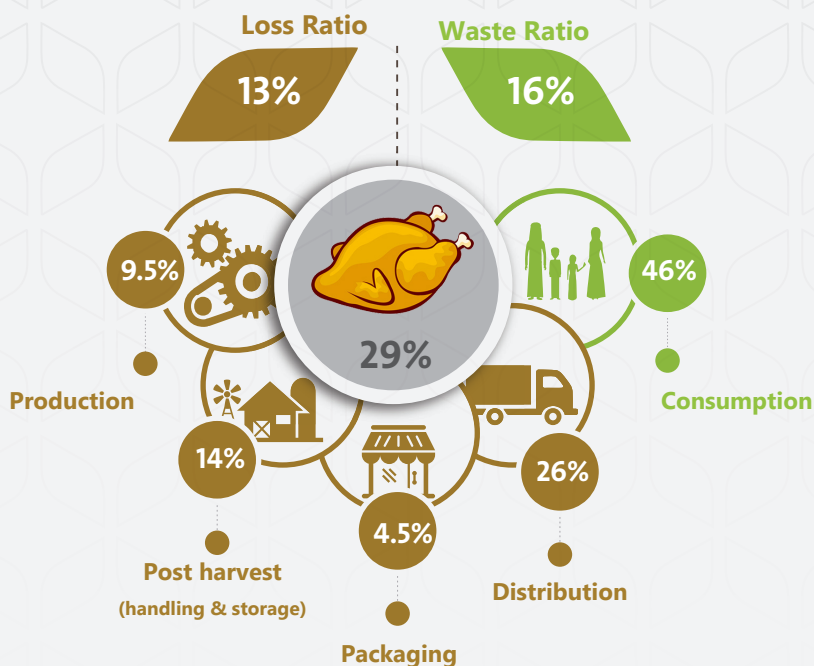

| Food Supply chain                 | FLW Ratio | FLW amount<br>(Thousand tons) |
|-----------------------------------|-----------|-------------------------------|
| Production                        | 9.5%      | 41.876                        |
| Post harvest (handling & storage) | 14%       | 63.652                        |
| Packaging                         | 4.5%      | 19.458                        |
| Distribution                      | 26%       | 115.709                       |
| Consumption                       | 46%       | 203.722                       |

The total FLW per capita **13** Kgs/year

**7**  
Loss Size

**6**  
Waste Size

The total value of FLW for product

**2,799** Million SR/year

## Loss - Waste Ratios for ( Fish )

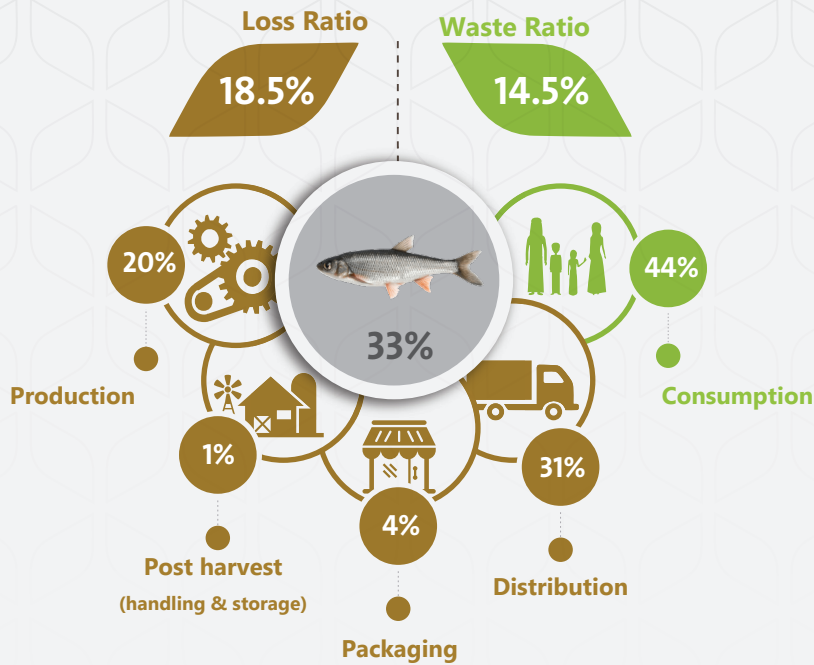

| Food Supply chain                 | FLW Ratio | FLW amount (Thousand tons) |
|-----------------------------------|-----------|----------------------------|
| Production                        | 20%       | 13.903                     |
| Post harvest (handling & storage) | 1%        | 0.670                      |
| Packaging                         | 4%        | 2.846                      |
| Distribution                      | 31%       | 21.482                     |
| Consumption                       | 44%       | 30.506                     |

The total FLW per capita **2.4** Kgs/year

The total value of FLW for product

**1.4**  
Loss Size

**1**  
Waste Size

**494**

Million SR/year

## Data and information sources

| s  | Data / Information                                                                      | Source                                                                                                                                                                             | publish date |
|----|-----------------------------------------------------------------------------------------|------------------------------------------------------------------------------------------------------------------------------------------------------------------------------------|--------------|
| 1  | Production quantity of study products (2016)                                            | General Authority for Statistics                                                                                                                                                   | (2017)       |
| 2  | Exports quantity of study products (2016)                                               | General Authority for Statistics                                                                                                                                                   | (2017)       |
| 3  | Imports quantity of study products (2016)                                               | General Authority for Statistics                                                                                                                                                   | (2017)       |
| 4  | Quantity of Wheat Imports (2016)                                                        | Saudi Grain Organization (SAGO) website                                                                                                                                            | (2017)       |
| 5  | Production quantity of study products in detail (2016)                                  | Arab Organization for Agricultural Development                                                                                                                                     | (2018)       |
| 6  | Exports quantity of study products in detail (2016)                                     | General Authority for Statistics                                                                                                                                                   | (2018)       |
| 7  | Imports quantity of study products in detail (2016)                                     | General Authority for Statistics                                                                                                                                                   | (2018)       |
| 8  | Value of imports in dollars (2016)                                                      | General Authority for Statistics                                                                                                                                                   | (2017)       |
| 9  | Production of red and white meat in tons (2016)                                         | Food and Agriculture Organization of the United Nations (FAO)                                                                                                                      | (2017)       |
| 10 | Quantity of food loss & waste of in KSA (2018)                                          | Field survey                                                                                                                                                                       | (2018)       |
| 11 | Food loss & waste data for four major retail markets (retail sector) for 14 days (2018) | A local retail company owning a chain of major commercial markets (more than 200 branches) in Saudi Arabia                                                                         | (2018)       |
| 12 | International Standard for the Calculation Food Loss and Waste of                       | Gustavsson, J., Cederberg, C., Sonesson U., Global food losses and food waste: Extent, causes and prevention. Rome: Food and Agriculture Organization of the United Nations (FAO). | (2011)       |

## Exports & Imports of Food Products

| s                  | Product                 | Production quantity (1000 tons) | Imports quantity (1000 tons) | Imports Value (Million SR) | Exports quantity (1000 tons) | Exports Value (Million SR) |
|--------------------|-------------------------|---------------------------------|------------------------------|----------------------------|------------------------------|----------------------------|
| 1                  | Bread                   | -                               | 6.10                         | 58.13                      | 8.06                         | 32.57                      |
| 2                  | Flour                   | 10.00                           | 3,004.00                     | 2,990.28                   | 0.33                         | 0.89                       |
| 3                  | Rice                    | -                               | 1,300.00                     | 3,927.76                   | 11.83                        | 39.79                      |
| 4                  | Dates                   | 964.54                          | 0.44                         | 2.57                       | 135.88                       | 584.21                     |
| 5                  | Zucchini                | 95.90                           | 1.24                         | 2.43                       | 5.15                         | 5.39                       |
| 6                  | Tomato                  | 503.22                          | 202.71                       | 371.95                     | 17.61                        | 24.12                      |
| 7                  | Cucumber                | 204.85                          | 1.51                         | 4.80                       | 14.53                        | 15.27                      |
| 8                  | Onion                   | 88.74                           | 366.25                       | 558.08                     | -                            | -                          |
| 9                  | Potato                  | 432.77                          | 53.68                        | 99.61                      | 0.02                         | 0.02                       |
| 10                 | Carrots                 | 45.68                           | 49.94                        | 75.70                      | 6.53                         | 7.17                       |
| 11                 | Unclassified Vegetables | 568.19                          | 446.29                       | 2,014.44                   | 225.34                       | 145.26                     |
| 12                 | Orange                  | -                               | 418.45                       | 742.83                     | 19.27                        | 28.02                      |
| 13                 | Mango                   | -                               | 41.89                        | 149.65                     | 1.97                         | 4.54                       |
| 14                 | Watermelon              | 394.93                          | 9.66                         | 57.02                      | 0.18                         | 0.16                       |
| 15                 | Unclassified Fruits     | 1,259.79                        | 1,258.49                     | 2,274.01                   | 232.26                       | 783.26                     |
| 16                 | Sheep                   | 127.75                          | 46.55                        | 860.11                     | 2.52                         | 9.72                       |
| 17                 | Camel                   | 63.01                           | 23.14                        | 265.24                     | 0.09                         | 1.23                       |
| 18                 | Unclassified meat       | 43.99                           | 102.17                       | 1,428.10                   | 42.20                        | 427.72                     |
| 19                 | Poultry                 | 755.86                          | 899.01                       | 5,661.21                   | 33.40                        | 553.72                     |
| 20                 | Fish                    | 121.40                          | 163.41                       | 1,105.50                   | 21.50                        | 84.33                      |
| Vegetables (total) |                         | 1,939.40                        | 1,125.17                     | 2,855.61                   | 197.10                       | 257.82                     |
| Fruits (total)     |                         | 1,654.71                        | 1731.32                      | 5624.13                    | 253.79                       | 848.51                     |
| Meat (total)       |                         | 234.76                          | 171.86                       | 1169.85                    | 44.81                        | 438.67                     |

\* Source:

Statistical Book of Arab Cultures, Vol 37, 2016, Arab Organization for Agricultural Development. Imports and Exports (2016), General Authority for Statistics, KSA.

United States Department of Agriculture (Foreign Agriculture Service)

## Scientific & Administrative Study Team

### Supervisory Team

**Dr. Abdulrahman Nasser Al-Khorayef**, Assistant Professor of Management Decision Making & Leadership, Head of Scientific Study Team

**Dr. Riyadh Ahmed Al Shaeel**, Assistant Professor of Strategic Management - Member of the Supervisory Team

**Dr. Abdul Aziz Mohammed Al-Muhanna**, Assistant of Head of Scientific Study Team

**Mr. Mohammed Abdullah Aldawood**, Member of the Faculty of Imam University, Media Advisor

**Mr. Abdullah Abdulaziz A Alhumud**, Lecturer in business Administration - Administrative Advisor

### Organization & Consumer Behavioral Team

**Prof. Mostafa Mohamed Al Kerdawy**, Professor Of Human Resource Management (HRM) - Member of the scientific team

**Dr. Kais Gannouni**, Assistant Professor of Human Resource Management- Head of the Organization & Consumer Behavioral team

**Dr. Karim Abdel Salam Mezghani**, Associate Professor of Business Administration

**Ms. Alia Khalid Aleshaiwi**, Lecturer of Marketing & Consumer Behaviour

### Legal Team

**Dr. Muath Abdulaziz Almajed**, Assistant Professor of Commercial Law - Head of Legal team

**Mr. Mohammed Ibrahim Alghadeer**, Legal consultant



## Economic Team

**Dr. Hedi Ben Hadi Haddad,**  
Associate Professor of Econometrics - Head of Economic team

**Dr. Mohamed Anis ALLOUCHE,**  
Associate Professor in Operations and Decision Systems

**Dr. Adel ibn al-Taher TLILI**  
Assistant Professor of Economics

**Dr. Abdessalem Meftah Gouider,**  
Assistant Professor of Economics

**Dr. Emad Mahmoud MEZGHANI,**  
Assistant Professor of Economics

## International experts

**Mr. Brian Lipinski,**  
Associate in the Food Program at World Resource Institute, USA

**Dr. Samia Bent Ali HADDAD,** Associate Professor in economics  
sciences & agro-economic, France-Tunis

**Dr. Claudia Giordano,**  
FAO Consultant, Food waste expert, Italy

**Dr. Iman Nouri Al - Janabi,**  
International consultant in translation

## Administrative Support Team

**Mr. Hussam Mustafa Nasr ,**  
Principle Assistant

**Mr. Ahmed Sabri Abu Aisha,**  
Project Manager

**Mr. Ahmed Al - Jazouli Ahmed Al - Jazuli ,**  
Accountant

**Mr. Mohammed bin Youssif bin Soleymane ,**  
Data Scientist

**Mr. Abdul Rahman bin Abdullah Hafez,**  
Assistant Media Advisor

## Business Partners

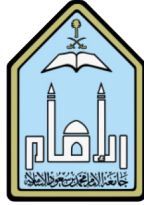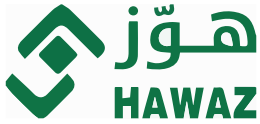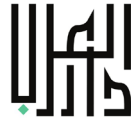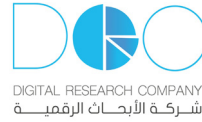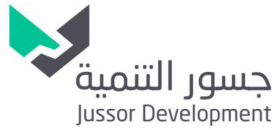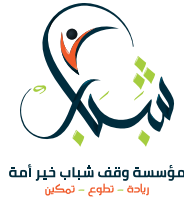

## International Consultants

منظمة الأغذية والزراعة  
للأمم المتحدة

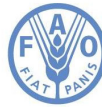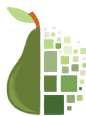

Food  
Loss + Waste  
PROTOCOL

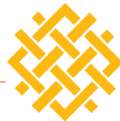

WORLD  
RESOURCES  
INSTITUTE

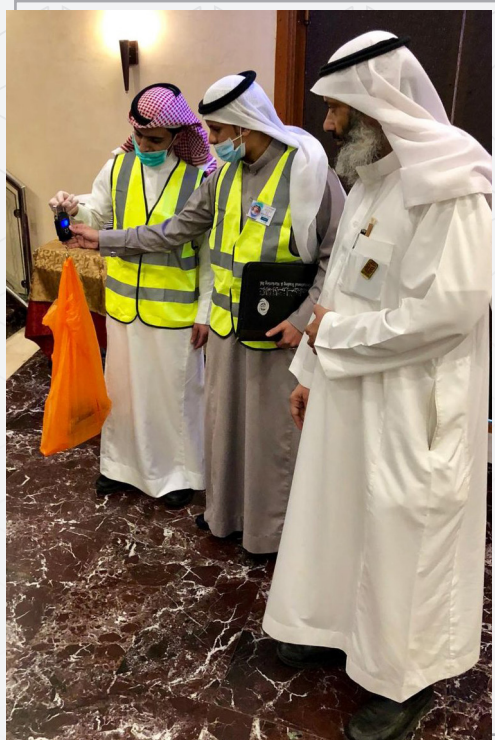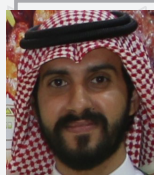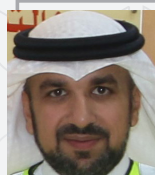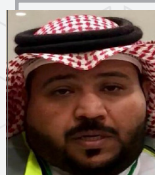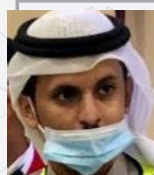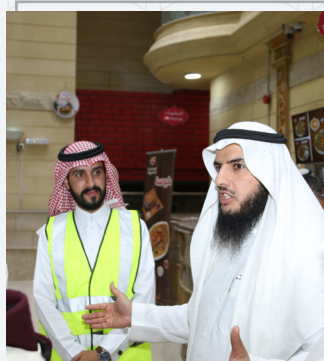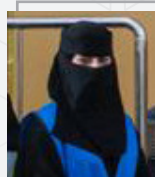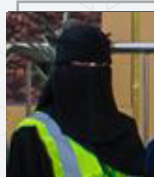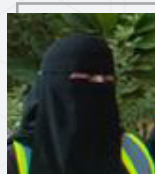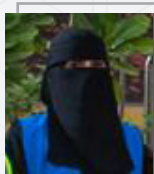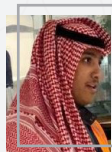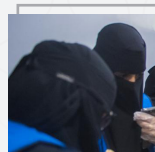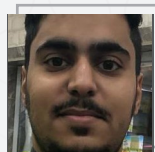

FOCUS  
GROUPS

# Workshop Meeting Team & Events

# Field Survey Interviews

# Training Inspection Visits

SOCIAL  
MEDIA

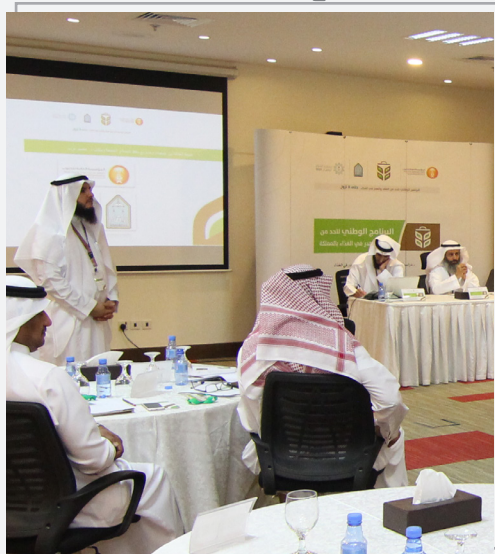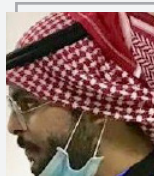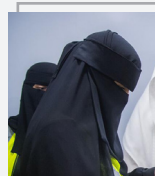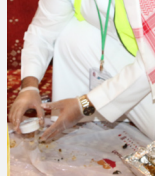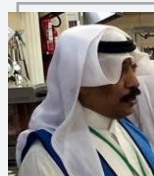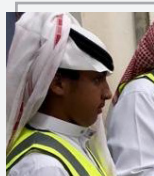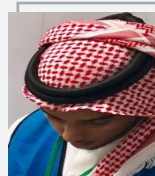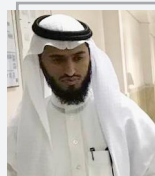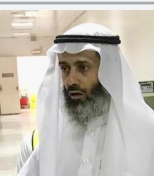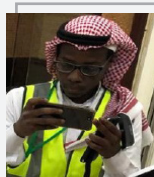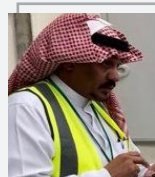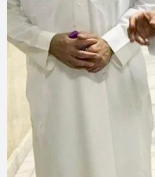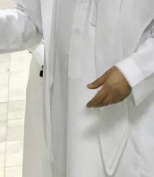



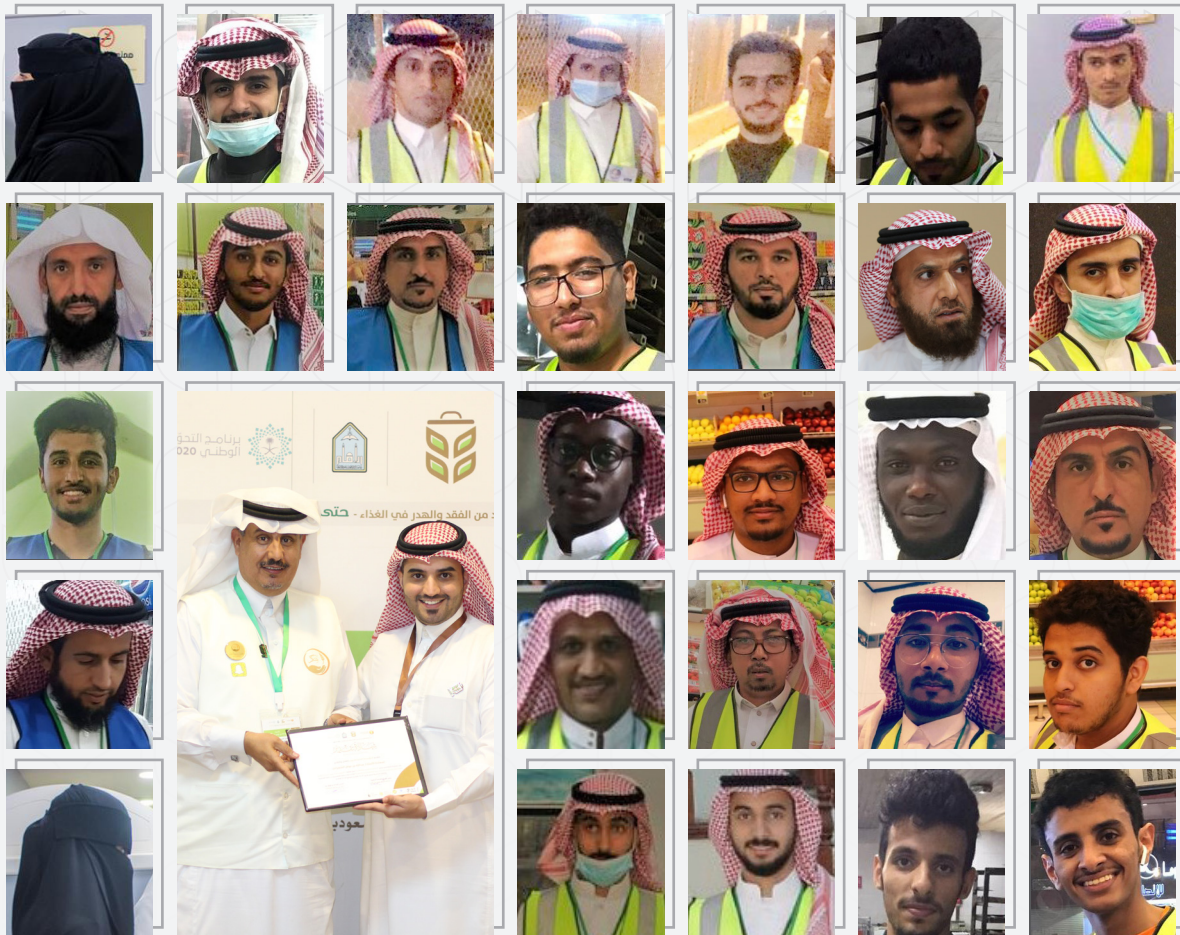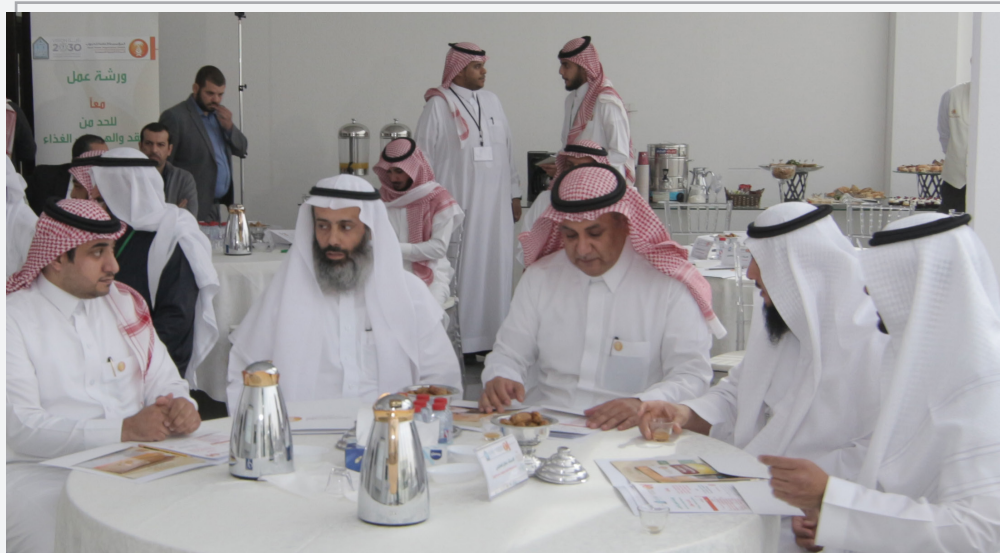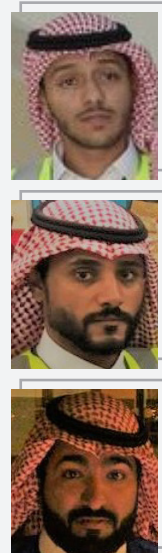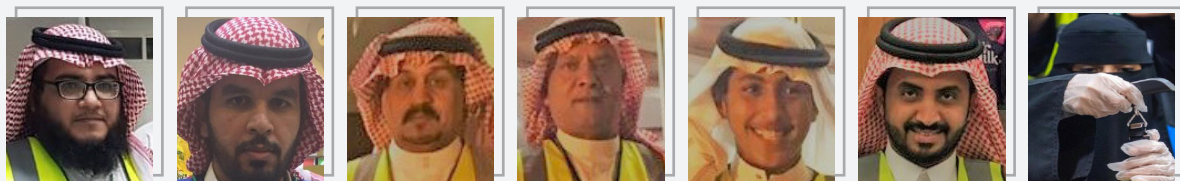



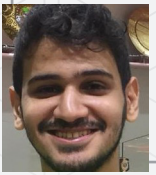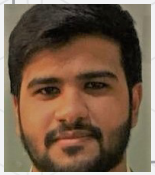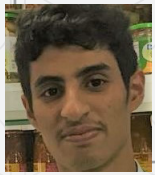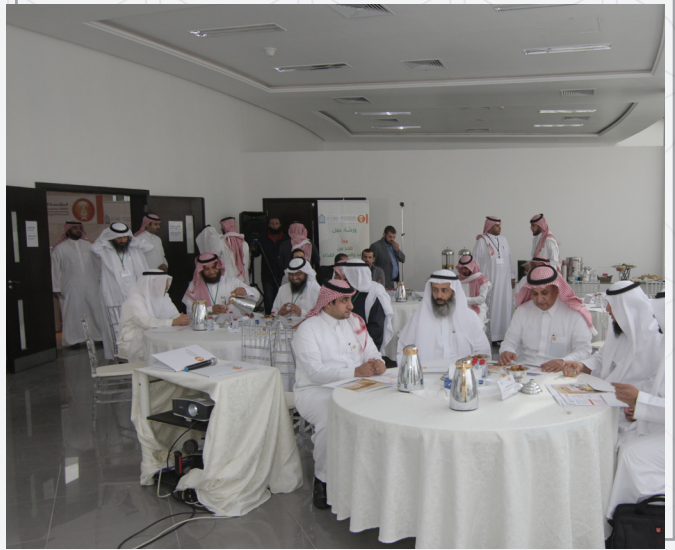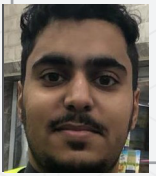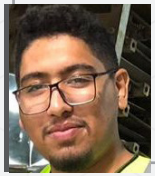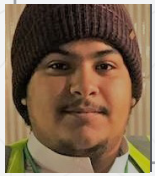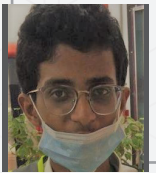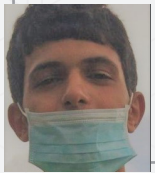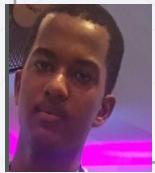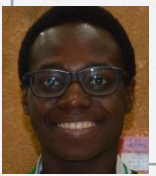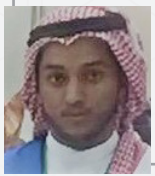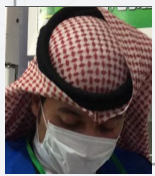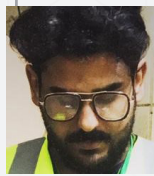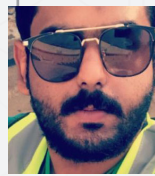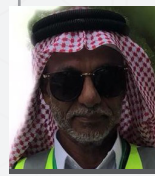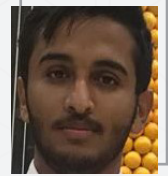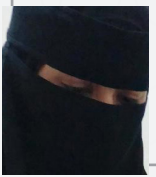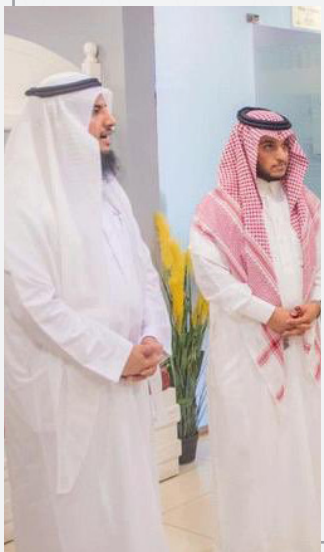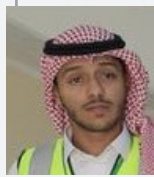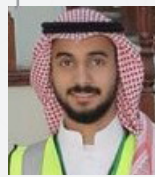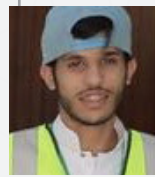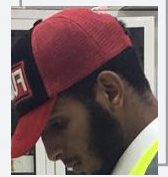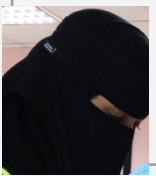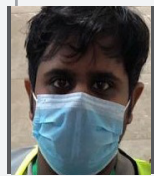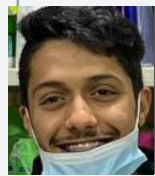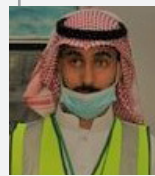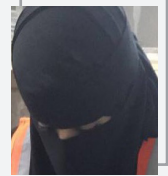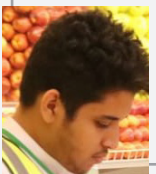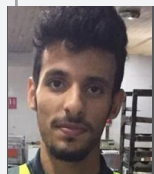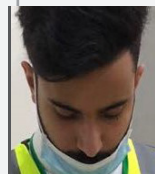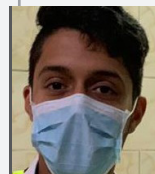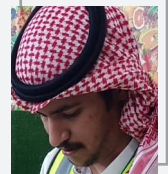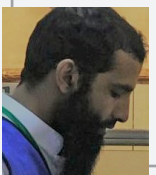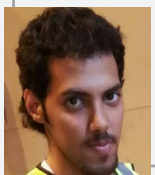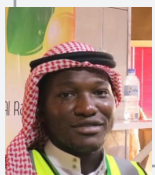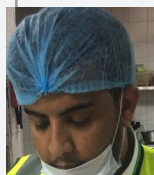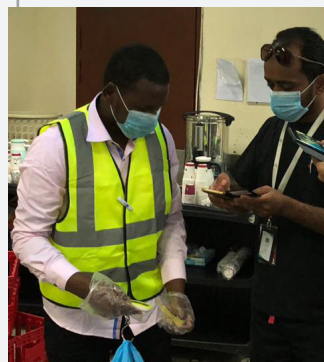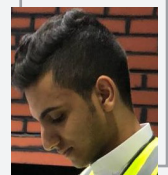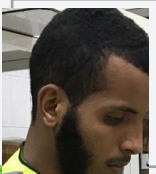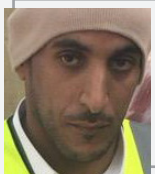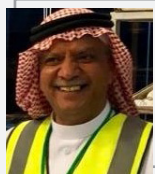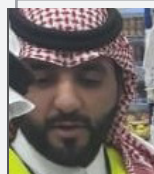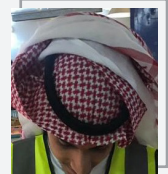



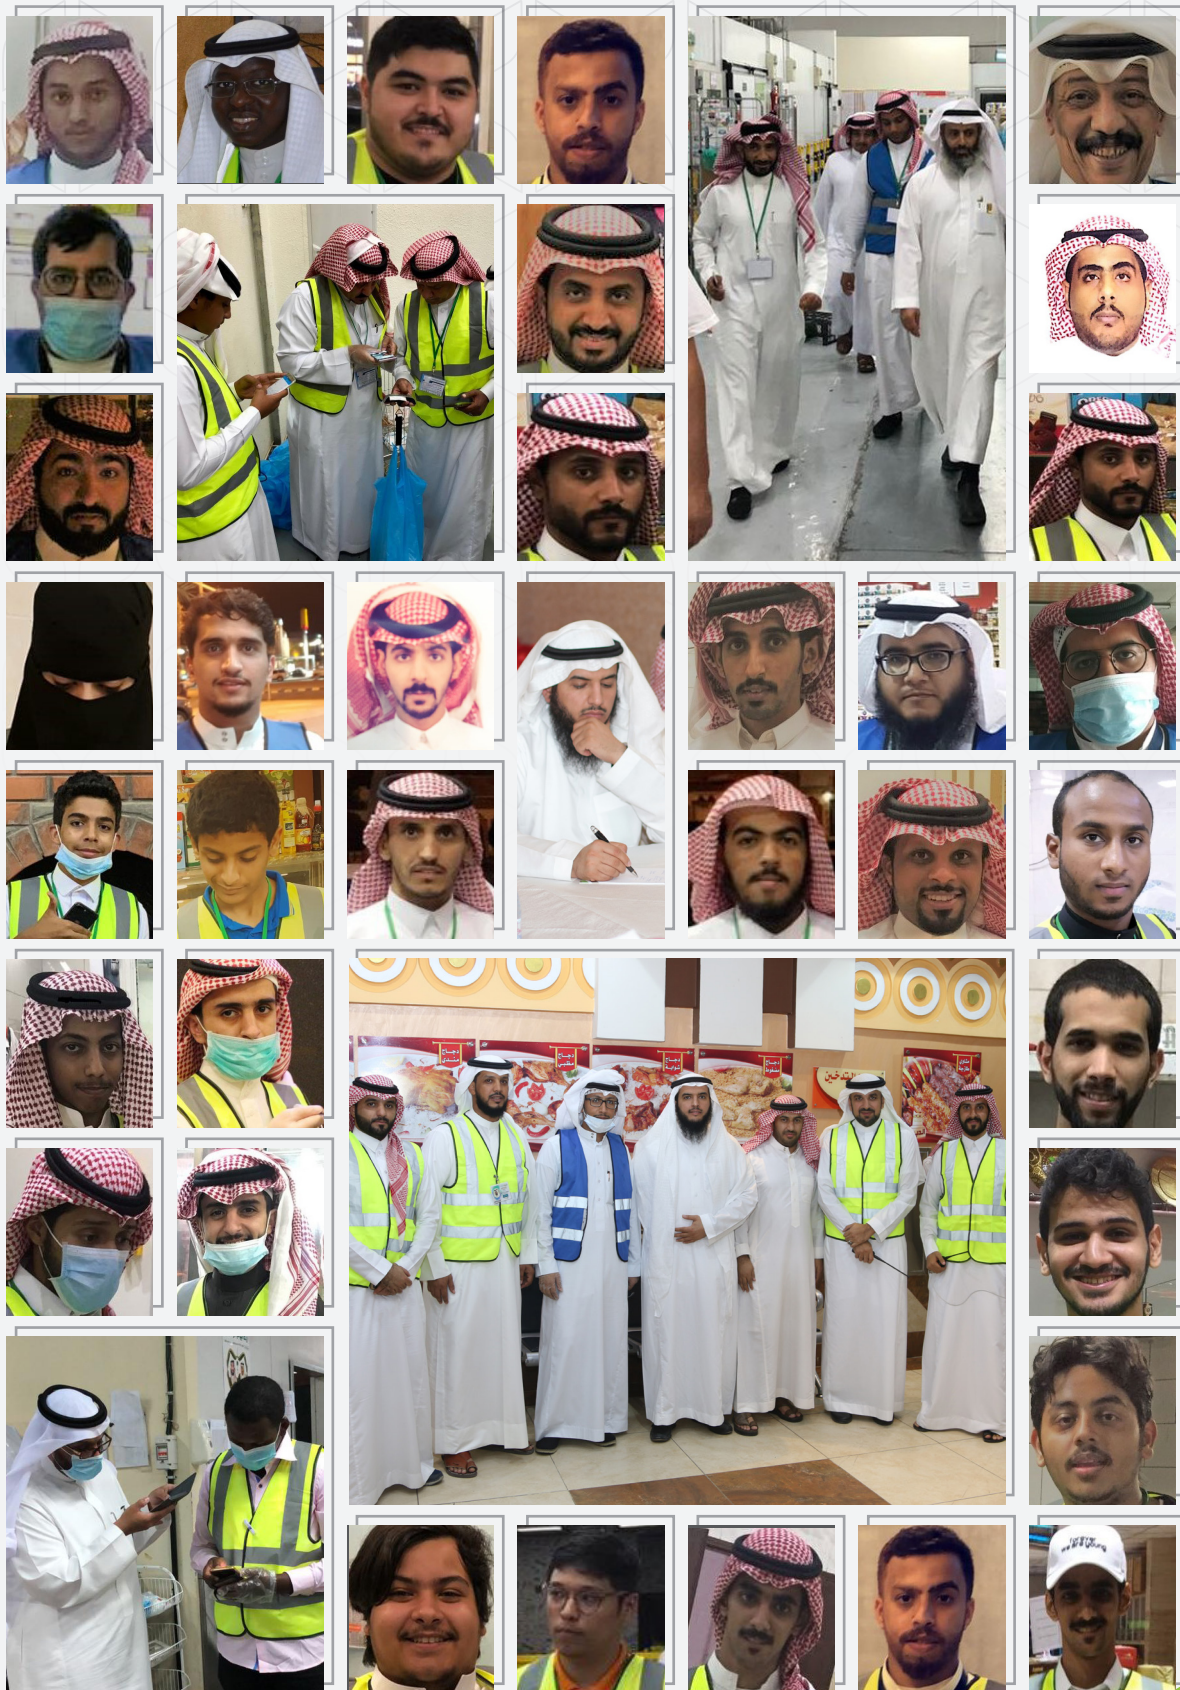



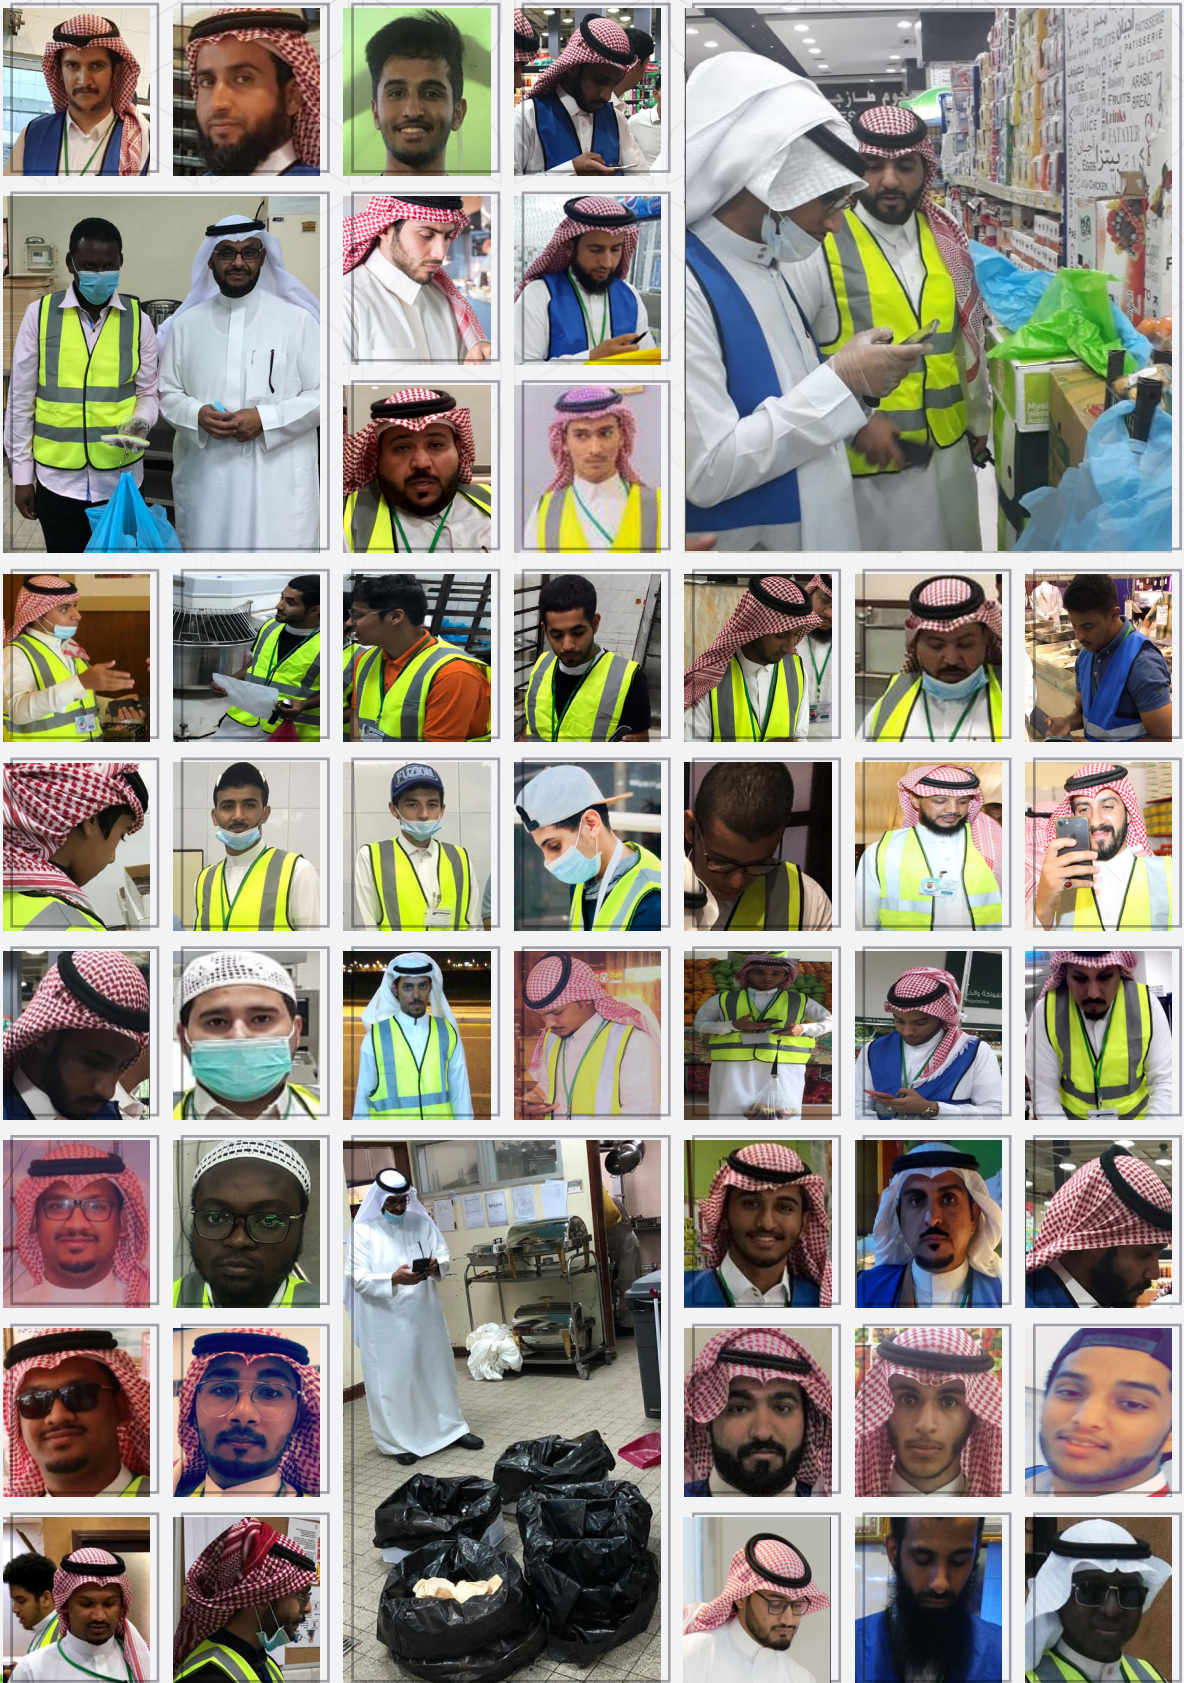

National Program for  
Reducing FLW in KSA

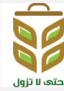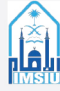

المؤسسة العامة للحبوب  
Saudi Grains Organization (SAGO)  
المملكة العربية السعودية

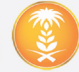

f flw\_saudi

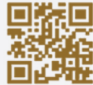

FLW\_SAUDI

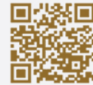

@ flw\_saudia

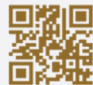

flw\_saudia

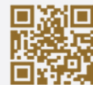

ردمك : 978-603-02-9520-3
